# Supplementary material for: Hopping transport in perylene diimide based organic solar cells: a DFT approach
Source: Royal Society of Chemistry journal article supplement (doi:10.1039/d2nj03429h), 2022-01-01
Supplement: d2nj03429h1.pdf [file d2nj03429h1.pdf]

## Supporting Information

### Hopping transport in perylene diimide based organic solar cells : A DFT approach

Smiti Rani Bora<sup>1</sup> and Dhruva Jyoti Kalita<sup>1,\*</sup>

Department of Chemistry, Gauhati University, Guwahati-781014, India

E-mail: [dhrubajyoti.kalita@gauhati.ac.in](mailto:dhrubajyoti.kalita@gauhati.ac.in)

Table S1 : Coordinates of the designed compounds studied at B3LYP-D3 level of theory in the angstrom unit.

#### 1. Compound PDI-DTT-1

| Atoms | Coordinates (Angstroms) |           |           |
|-------|-------------------------|-----------|-----------|
|       | X                       | Y         | Z         |
| C     | 7.396273                | -0.929826 | -0.656145 |
| C     | 6.104679                | -1.313679 | -0.221545 |
| C     | 5.858864                | -2.661580 | 0.133505  |
| C     | 6.937065                | -3.675349 | 0.054898  |
| C     | 8.500565                | -1.916902 | -0.750353 |
| N     | 8.192051                | -3.236940 | -0.385972 |
| C     | 4.599838                | -3.040648 | 0.564798  |
| C     | 3.566087                | -2.101290 | 0.642779  |
| C     | 3.757848                | -0.763578 | 0.291856  |
| C     | 5.055737                | -0.347020 | -0.140103 |
| C     | 5.330670                | 1.013069  | -0.488493 |
| C     | 7.638038                | 0.388705  | -1.000203 |
| C     | 6.618545                | 1.343213  | -0.915084 |
| C     | 2.676050                | 0.230020  | 0.353662  |
| C     | 2.954561                | 1.595594  | 0.038783  |
| C     | 4.257094                | 2.012386  | -0.379483 |
| C     | 1.899218                | 2.555177  | 0.148894  |
| C     | 2.167679                | 3.914293  | -0.156651 |
| C     | 4.464015                | 3.361109  | -0.671885 |
| C     | 3.434237                | 4.298006  | -0.563639 |
| C     | 0.313508                | 0.810068  | 0.772194  |
| C     | 0.589829                | 2.166150  | 0.550067  |
| C     | 1.372471                | -0.119407 | 0.680527  |
| C     | -0.423050               | 3.219651  | 0.831141  |
| C     | 1.118920                | 4.955660  | -0.053817 |

|   |            |           |           |
|---|------------|-----------|-----------|
| N | -0.120147  | 4.530342  | 0.432598  |
| H | 4.433315   | -4.076964 | 0.839147  |
| H | 2.598570   | -2.441183 | 0.992485  |
| H | 1.111894   | -1.156967 | 0.846958  |
| H | 3.606211   | 5.343390  | -0.796322 |
| H | 5.438393   | 3.711978  | -0.989525 |
| H | 6.858025   | 2.362406  | -1.193427 |
| H | 8.632338   | 0.665885  | -1.333816 |
| O | 9.622686   | -1.603735 | -1.125106 |
| O | 6.764958   | -4.849478 | 0.355271  |
| O | -1.485418  | 3.002157  | 1.396087  |
| O | 1.324387   | 6.124292  | -0.356577 |
| C | -1.014564  | 0.236430  | 1.052075  |
| C | -1.335270  | -0.621402 | 2.079874  |
| C | -2.672366  | -1.090184 | 2.032816  |
| C | -3.374478  | -0.626544 | 0.938642  |
| S | -2.364719  | 0.417581  | -0.041242 |
| H | -0.635157  | -0.866624 | 2.871458  |
| H | -3.122605  | -1.722215 | 2.789771  |
| C | -4.737529  | -0.951568 | 0.573995  |
| C | -5.409979  | -2.121601 | 0.859301  |
| C | -6.744426  | -2.100497 | 0.383638  |
| C | -7.092322  | -0.922166 | -0.277177 |
| C | -8.427079  | -0.942339 | -0.760274 |
| C | -9.085751  | -2.134664 | -0.462600 |
| C | -10.429216 | -2.181730 | -0.932379 |
| C | -10.771117 | -1.026274 | -1.579478 |
| S | -8.065492  | -3.263254 | 0.421794  |
| S | -9.469565  | 0.145659  | -1.632369 |
| S | -5.766180  | 0.202328  | -0.295947 |
| H | -4.941297  | -2.958740 | 1.362461  |
| H | -11.720355 | -0.782642 | -2.037868 |
| H | -11.103387 | -3.019832 | -0.800882 |
| C | -1.173296  | 5.528201  | 0.654274  |
| H | -2.101455  | 5.180435  | 0.196884  |
| H | -1.346140  | 5.656552  | 1.726084  |
| H | -0.846097  | 6.464334  | 0.207864  |
| C | 9.243635   | -4.257709 | -0.458201 |
| H | 10.151311  | -3.780096 | -0.819588 |
| H | 9.403599   | -4.690224 | 0.532355  |
| H | 8.931997   | -5.056867 | -1.134813 |

## 2. Compound PDI-DTT-2

|   |           |           |           |
|---|-----------|-----------|-----------|
| C | 6.140650  | -3.295812 | -0.022969 |
| C | 6.726941  | -2.015822 | 0.125851  |
| C | 8.122419  | -1.906871 | 0.336124  |
| C | 8.976015  | -3.116331 | 0.406320  |
| C | 6.963580  | -4.529924 | 0.037339  |
| N | 8.339434  | -4.354441 | 0.251943  |
| C | 8.699813  | -0.657637 | 0.478367  |
| C | 7.914143  | 0.498064  | 0.408326  |
| C | 6.534733  | 0.442060  | 0.198495  |
| C | 5.916329  | -0.841027 | 0.062870  |
| C | 4.507267  | -0.978011 | -0.137620 |
| C | 4.777002  | -3.404341 | -0.234064 |
| C | 3.974871  | -2.259463 | -0.290722 |
| C | 5.703400  | 1.651632  | 0.105735  |
| C | 4.291263  | 1.516479  | -0.078277 |
| C | 3.673470  | 0.231972  | -0.177358 |
| C | 3.469411  | 2.684103  | -0.166220 |
| C | 2.059857  | 2.579315  | -0.330830 |
| C | 2.289046  | 0.171034  | -0.277515 |
| C | 1.462084  | 1.312627  | -0.339128 |
| C | 5.441842  | 4.074486  | 0.104029  |
| C | 4.073686  | 3.964250  | -0.076564 |
| C | 6.244445  | 2.934918  | 0.192693  |
| C | 3.275068  | 5.208793  | -0.170709 |
| C | 1.266207  | 3.810043  | -0.597412 |
| N | 1.909946  | 5.043817  | -0.422009 |
| H | 9.770449  | -0.594214 | 0.641795  |
| H | 8.411640  | 1.453495  | 0.523457  |
| H | 7.309980  | 3.074503  | 0.329135  |
| H | 5.874525  | 5.066580  | 0.175535  |
| H | 2.913708  | -2.393799 | -0.463754 |
| H | 4.345070  | -4.392222 | -0.353403 |
| O | 6.474301  | -5.644026 | -0.092276 |
| O | 10.185114 | -3.063629 | 0.589439  |
| O | 3.777904  | 6.319154  | -0.054725 |
| O | 0.101626  | 3.794269  | -0.969272 |
| C | 0.009505  | 1.056747  | -0.351805 |
| C | -0.666380 | 0.263089  | -1.248441 |

|   |            |           |           |
|---|------------|-----------|-----------|
| C | -2.037431  | 0.135220  | -0.903477 |
| C | -2.390300  | 0.798161  | 0.261925  |
| C | -3.764044  | 0.664808  | 0.637299  |
| C | -4.468748  | -0.116440 | -0.282433 |
| S | -1.027656  | 1.617845  | 0.961602  |
| S | -3.412092  | -0.692395 | -1.585934 |
| H | -0.196475  | -0.174427 | -2.121434 |
| C | -5.861571  | -0.490538 | -0.306633 |
| C | -6.533726  | -1.097905 | -1.355507 |
| C | -7.884632  | -1.368661 | -1.048117 |
| C | -8.261262  | -0.968840 | 0.234428  |
| S | -6.935975  | -0.241269 | 1.090425  |
| H | 1.782692   | -0.786003 | -0.275841 |
| C | -9.627419  | -1.238296 | 0.506603  |
| C | -10.278881 | -1.844954 | -0.567347 |
| S | -9.214722  | -2.091898 | -1.947332 |
| C | -11.650562 | -2.133084 | -0.318497 |
| S | -10.713389 | -1.014473 | 1.849266  |
| H | -6.067338  | -1.324845 | -2.307177 |
| H | -12.997413 | -1.833218 | 1.397032  |
| H | -12.324491 | -2.601172 | -1.026217 |
| C | -12.021726 | -1.741240 | 0.938584  |
| C | 1.078347   | 6.236347  | -0.623653 |
| H | 0.757560   | 6.294872  | -1.667079 |
| H | 0.188488   | 6.166017  | 0.004754  |
| H | 1.673513   | 7.107499  | -0.359959 |
| C | 9.203649   | -5.538203 | 0.323090  |
| H | 9.706908   | -5.566439 | 1.292397  |
| H | 8.579626   | -6.418574 | 0.188404  |
| H | 9.965997   | -5.482648 | -0.457575 |
| C | -4.297519  | 1.279877  | 1.796472  |
| C | -4.689166  | 1.826890  | 2.803118  |
| H | -5.060360  | 2.302744  | 3.682399  |

### 3. Compound PDI-DTT-3

|   |           |           |           |
|---|-----------|-----------|-----------|
| C | -6.328171 | -1.993233 | -0.069953 |
| C | -6.176083 | -0.617133 | -0.366217 |
| C | -7.279090 | 0.116782  | -0.864543 |
| C | -8.588782 | -0.539128 | -1.085909 |
| C | -7.625495 | -2.684263 | -0.274883 |

|   |           |           |           |
|---|-----------|-----------|-----------|
| N | -8.677676 | -1.902838 | -0.777234 |
| C | -7.135459 | 1.463297  | -1.148883 |
| C | -5.910256 | 2.105595  | -0.938501 |
| C | -4.795032 | 1.425779  | -0.444740 |
| C | -4.917916 | 0.028335  | -0.161447 |
| C | -3.814449 | -0.738370 | 0.327078  |
| C | -5.253361 | -2.709947 | 0.427489  |
| C | -4.016154 | -2.087527 | 0.623811  |
| C | -3.509132 | 2.096454  | -0.199057 |
| C | -2.399099 | 1.327165  | 0.267750  |
| C | -2.512570 | -0.079164 | 0.503225  |
| C | -1.140000 | 1.963954  | 0.503894  |
| C | -0.013748 | 1.220968  | 0.952065  |
| C | -1.369619 | -0.785772 | 0.849034  |
| C | -0.113634 | -0.174265 | 1.057258  |
| C | -2.101665 | 4.086364  | -0.180266 |
| C | -1.014926 | 3.358132  | 0.274148  |
| C | -3.330958 | 3.465257  | -0.410600 |
| C | 0.265963  | 4.068349  | 0.501242  |
| C | 1.192549  | 1.955105  | 1.419095  |
| N | 1.300795  | 3.305226  | 1.048859  |
| H | -7.991107 | 2.008493  | -1.533172 |
| H | -5.847169 | 3.161453  | -1.172516 |
| H | -4.152347 | 4.078838  | -0.760386 |
| H | -1.973464 | 5.149221  | -0.355015 |
| H | -3.206042 | -2.684969 | 1.025181  |
| H | -5.391043 | -3.760474 | 0.660220  |
| O | -7.776802 | -3.872282 | -0.022172 |
| O | -9.565495 | 0.059238  | -1.517920 |
| O | 0.408573  | 5.258538  | 0.249457  |
| O | 2.065217  | 1.455146  | 2.114013  |
| C | 1.010760  | -1.063180 | 1.310265  |
| C | 1.126507  | -2.222629 | 2.041508  |
| C | 2.469337  | -2.662889 | 1.907982  |
| C | 3.093622  | -1.756172 | 1.077959  |
| H | 0.348841  | -2.672174 | 2.643174  |
| C | 4.430259  | -1.641856 | 0.566836  |
| C | 5.440387  | -2.580275 | 0.635662  |
| C | 6.637728  | -2.106428 | 0.049319  |
| C | 6.540176  | -0.814623 | -0.471877 |
| S | 4.950872  | -0.150441 | -0.230449 |
| H | -1.400688 | -1.865974 | 0.922916  |

|   |            |           |           |
|---|------------|-----------|-----------|
| C | 7.752833   | -0.376237 | -1.064342 |
| C | 8.764153   | -1.333560 | -0.988071 |
| S | 8.236773   | -2.805947 | -0.181273 |
| C | 9.994280   | -0.917697 | -1.571814 |
| S | 8.315609   | 1.063045  | -1.866610 |
| H | 5.310175   | -3.560046 | 1.079758  |
| H | 10.673054  | 0.916519  | -2.582576 |
| H | 10.895836  | -1.517443 | -1.612559 |
| C | 9.900188   | 0.347606  | -2.083024 |
| C | 2.552185   | 3.976049  | 1.418674  |
| H | 2.611224   | 4.091945  | 2.504559  |
| H | 3.394968   | 3.364106  | 1.092488  |
| H | 2.565437   | 4.950424  | 0.935469  |
| C | -9.983636  | -2.531932 | -1.004123 |
| H | -10.263249 | -2.425848 | -2.054897 |
| H | -9.902918  | -3.581617 | -0.731640 |
| H | -10.741932 | -2.033030 | -0.395860 |
| H | 2.930756   | -3.518628 | 2.379373  |
| O | 2.202959   | -0.795328 | 0.700516  |

#### 4. Compound PDI-DTT-4

|   |           |           |           |
|---|-----------|-----------|-----------|
| C | 1.883754  | 4.087937  | 0.000036  |
| C | 1.456126  | 2.735800  | 0.000014  |
| C | 0.067241  | 2.441050  | -0.000034 |
| C | -0.926821 | 3.537843  | -0.000045 |
| C | 0.915621  | 5.208612  | -0.000060 |
| N | -0.436620 | 4.852716  | -0.000120 |
| C | -0.351074 | 1.099192  | -0.000083 |
| C | 0.629717  | 0.073599  | -0.000081 |
| C | 1.990988  | 0.328852  | 0.000031  |
| C | 2.434904  | 1.691485  | 0.000051  |
| C | 3.823961  | 2.022037  | 0.000120  |
| C | 3.236497  | 4.387340  | 0.000188  |
| C | 4.191316  | 3.370143  | 0.000251  |
| C | 2.986821  | -0.755219 | 0.000131  |
| C | 4.376911  | -0.419046 | 0.000074  |
| C | 4.821352  | 0.940926  | 0.000027  |
| C | 5.346568  | -1.468852 | 0.000060  |
| C | 6.729318  | -1.163538 | -0.000045 |

|   |            |           |           |
|---|------------|-----------|-----------|
| C | 7.137369   | 0.158628  | -0.000157 |
| C | 3.580851   | -3.125343 | 0.000253  |
| C | 4.930768   | -2.821498 | 0.000149  |
| C | 2.625293   | -2.103617 | 0.000263  |
| C | 5.924218   | -3.921137 | 0.000118  |
| C | 7.754008   | -2.236913 | -0.000105 |
| N | 7.276641   | -3.556975 | 0.000062  |
| H | 1.580563   | -2.390501 | 0.000406  |
| H | 3.281366   | -4.168082 | 0.000317  |
| H | 8.200246   | 0.375527  | -0.000271 |
| H | 3.533932   | 5.430459  | 0.000240  |
| O | 1.271636   | 6.380874  | -0.000074 |
| O | -2.137597  | 3.352404  | -0.000032 |
| O | 5.604277   | -5.102725 | 0.000164  |
| O | 8.953158   | -1.991933 | -0.000271 |
| C | 8.242551   | -4.661439 | -0.000153 |
| H | 8.088646   | -5.282544 | -0.885748 |
| H | 8.088663   | -5.282832 | 0.885226  |
| C | -1.448669  | 5.914488  | -0.000128 |
| H | -2.081768  | 5.818364  | -0.885400 |
| H | -0.930059  | 6.870315  | -0.000404 |
| C | 6.194598   | 1.192487  | -0.000113 |
| H | 6.564147   | 2.210715  | -0.000224 |
| H | 5.236299   | 3.655153  | 0.000438  |
| C | -4.174251  | -0.150655 | -0.000105 |
| C | -6.487748  | -0.025024 | 0.000157  |
| C | -6.328831  | -1.416557 | 0.000032  |
| C | -7.569947  | -2.102060 | -0.000060 |
| C | -8.662136  | -1.233439 | 0.000034  |
| S | -4.651465  | -1.864523 | -0.000196 |
| S | -8.181082  | 0.457568  | 0.000250  |
| S | -8.091562  | -3.763282 | -0.000130 |
| C | -9.921591  | -1.896723 | 0.000024  |
| H | -10.884555 | -1.400074 | 0.000072  |
| C | -9.767585  | -3.256168 | -0.000049 |
| H | -10.546362 | -4.007346 | -0.000084 |
| C | -5.274064  | 0.693362  | 0.000072  |
| H | -5.168149  | 1.771339  | 0.000142  |
| H | -2.081467  | 5.818719  | 0.885398  |
| H | 9.242234   | -4.233397 | -0.000139 |
| H | 0.258038   | -0.943026 | -0.000184 |
| C | -1.702735  | 0.690145  | -0.000136 |

|   |           |          |           |
|---|-----------|----------|-----------|
| C | -2.833290 | 0.233611 | -0.000139 |
|---|-----------|----------|-----------|

## 5. Compound PDI-DTT-5

|   |            |           |           |
|---|------------|-----------|-----------|
| C | -8.192025  | -3.632437 | -0.025517 |
| C | -8.915412  | -2.425658 | -0.179823 |
| C | -10.316045 | -2.471143 | -0.381992 |
| C | -11.042749 | -3.763970 | -0.440344 |
| C | -8.883749  | -4.942477 | -0.073025 |
| N | -10.268636 | -4.923969 | -0.281289 |
| C | -11.024502 | -1.291295 | -0.528240 |
| C | -10.367889 | -0.057089 | -0.470766 |
| C | -8.989368  | 0.038020  | -0.269891 |
| C | -8.235772  | -1.169945 | -0.129656 |
| C | -6.818959  | -1.153095 | 0.063524  |
| C | -6.823837  | -3.593399 | 0.178020  |
| C | -6.149871  | -2.368223 | 0.222094  |
| C | -8.292728  | 1.330830  | -0.190763 |
| C | -6.873474  | 1.349908  | -0.013320 |
| C | -6.120599  | 0.140172  | 0.091570  |
| C | -6.181096  | 2.599481  | 0.062941  |
| C | -4.767659  | 2.648150  | 0.224390  |
| C | -4.737700  | 0.229200  | 0.187196  |
| C | -4.036526  | 1.453003  | 0.240043  |
| C | -8.293750  | 3.767235  | -0.207237 |
| C | -6.920802  | 3.806137  | -0.032771 |
| C | -8.969575  | 2.547535  | -0.283808 |
| C | -6.261107  | 5.130243  | 0.049388  |
| C | -4.112847  | 3.959135  | 0.483853  |
| N | -4.886091  | 5.115041  | 0.299863  |
| H | -12.096644 | -1.343627 | -0.684844 |
| H | -10.966483 | 0.838185  | -0.587921 |
| H | -10.044474 | 2.570019  | -0.415861 |
| H | -8.830565  | 4.706724  | -0.282932 |
| H | -5.079656  | -2.384962 | 0.390110  |
| H | -6.288580  | -4.528948 | 0.301229  |
| O | -8.294734  | -6.007128 | 0.060255  |
| O | -12.252216 | -3.822743 | -0.617260 |
| O | -6.880619  | 6.179125  | -0.074583 |
| O | -2.954067  | 4.072735  | 0.857030  |



|   |            |           |           |
|---|------------|-----------|-----------|
| C | -2.565858  | 1.348460  | 0.258486  |
| C | -1.822791  | 0.606448  | 1.146979  |
| C | -0.442918  | 0.617419  | 0.819813  |
| C | -0.136877  | 1.336124  | -0.334602 |
| C | 1.235873   | 1.319469  | -0.685411 |
| C | 1.991491   | 0.591171  | 0.211904  |
| S | -1.573948  | 2.030623  | -1.032343 |
| S | 0.995307   | -0.077043 | 1.520732  |
| C | 3.414323   | 0.347996  | 0.191545  |
| C | 4.123600   | -0.627707 | 0.865010  |
| C | 5.511304   | -0.554567 | 0.598528  |
| C | 5.877454   | 0.464745  | -0.279784 |
| C | 7.261560   | 0.519185  | -0.570186 |
| C | 7.969302   | -0.462606 | 0.095821  |
| S | 4.480591   | 1.380871  | -0.781931 |
| S | 6.909599   | -1.465624 | 1.107009  |
| H | -2.258227  | 0.108429  | 2.005392  |
| H | 1.656299   | 1.799143  | -1.561626 |
| H | 3.653458   | -1.368120 | 1.501664  |
| H | 7.724516   | 1.224280  | -1.250743 |
| C | 9.388555   | -0.722525 | 0.057616  |
| C | 10.058640  | -1.878067 | 0.406656  |
| C | 11.459400  | -1.757756 | 0.234802  |
| C | 11.867925  | -0.515243 | -0.249549 |
| S | 10.508533  | 0.545689  | -0.481927 |
| H | -4.132411  | -0.668403 | 0.188942  |
| C | 13.273415  | -0.433564 | -0.424978 |
| C | 13.925715  | -1.614447 | -0.070833 |
| S | 12.810934  | -2.856775 | 0.485620  |
| C | 15.339312  | -1.560387 | -0.232500 |
| S | 14.409975  | 0.768880  | -0.967153 |
| H | 9.553384   | -2.774409 | 0.747446  |
| H | 16.749239  | -0.017790 | -0.924723 |
| H | 16.020450  | -2.373804 | -0.012098 |
| C | 15.740258  | -0.341683 | -0.706655 |
| C | -4.188204  | 6.391580  | 0.493697  |
| H | -3.297956  | 6.415855  | -0.137689 |
| H | -4.875185  | 7.191788  | 0.228435  |
| C | -10.931747 | -6.232134 | -0.328431 |
| H | -10.494158 | -6.835262 | -1.127307 |
| H | -10.779279 | -6.755243 | 0.618699  |
| H | -11.991229 | -6.065658 | -0.508303 |

## 6. Compound PDI-EDOT-1

|   |           |           |           |
|---|-----------|-----------|-----------|
| C | -6.504146 | -0.323741 | 0.611723  |
| C | -5.277742 | -0.881446 | 0.176092  |
| C | -5.213518 | -2.255553 | -0.157231 |
| C | -6.414769 | -3.116913 | -0.055912 |
| C | -7.726788 | -1.155595 | 0.731577  |
| N | -7.597454 | -2.510203 | 0.386409  |
| C | -4.018429 | -2.803032 | -0.590378 |
| C | -2.869826 | -2.010124 | -0.685740 |
| C | -2.880841 | -0.654565 | -0.351382 |
| C | -4.111813 | -0.062376 | 0.071558  |
| C | -4.205168 | 1.329712  | 0.388199  |
| C | -6.567896 | 1.021038  | 0.933015  |
| C | -5.434164 | 1.832940  | 0.819617  |
| C | -1.675472 | 0.184088  | -0.420562 |
| C | -1.775910 | 1.584470  | -0.153100 |
| C | -3.013998 | 2.179777  | 0.241702  |
| C | -0.603672 | 2.393340  | -0.286207 |
| C | -0.697978 | 3.786860  | -0.037053 |
| C | -3.048742 | 3.555113  | 0.477932  |
| C | -1.907216 | 4.346621  | 0.340910  |
| C | 0.752653  | 0.430106  | -0.804181 |
| C | 0.648602  | 1.821339  | -0.651277 |
| C | -0.424468 | -0.346130 | -0.702604 |
| C | 1.783925  | 2.725825  | -0.975883 |
| C | 0.475527  | 4.680418  | -0.170111 |
| N | 1.649394  | 4.081383  | -0.632959 |
| H | -3.992204 | -3.855752 | -0.851336 |
| H | -1.957686 | -2.477960 | -1.036795 |
| H | -0.301013 | -1.416034 | -0.813327 |
| H | -1.943973 | 5.414285  | 0.528742  |
| H | -3.972170 | 4.040065  | 0.770401  |
| H | -5.534971 | 2.879493  | 1.080708  |
| H | -7.513939 | 1.431580  | 1.269582  |
| O | -8.794787 | -0.692783 | 1.110222  |
| O | -6.402389 | -4.307921 | -0.339002 |
| O | 2.807749  | 2.357197  | -1.533332 |
| O | 0.421654  | 5.876943  | 0.087568  |

|   |           |           |           |
|---|-----------|-----------|-----------|
| C | 1.997398  | -0.327040 | -1.004934 |
| C | 2.202083  | -1.329763 | -1.927730 |
| C | 3.458438  | -1.967340 | -1.802571 |
| C | 4.220083  | -1.481006 | -0.754869 |
| S | 3.365241  | -0.191415 | 0.074361  |
| H | 1.475116  | -1.575134 | -2.694819 |
| H | 3.798152  | -2.758716 | -2.461991 |
| C | 5.529987  | -1.918889 | -0.337095 |
| C | 6.327626  | -1.420971 | 0.670738  |
| C | 7.590143  | -2.085305 | 0.799911  |
| C | 7.758603  | -3.089545 | -0.108949 |
| S | 6.366515  | -3.244741 | -1.141981 |
| O | 5.954519  | -0.394383 | 1.490217  |
| O | 8.517545  | -1.714727 | 1.734224  |
| H | 8.613754  | -3.740139 | -0.220540 |
| C | 7.068039  | 0.187095  | 2.185131  |
| C | 7.952216  | -0.903988 | 2.772976  |
| H | 6.641043  | 0.815609  | 2.969853  |
| H | 7.648043  | 0.810691  | 1.491940  |
| H | 7.363909  | -1.531709 | 3.456578  |
| H | 8.796574  | -0.472526 | 3.316087  |
| C | -8.773673 | -3.382007 | 0.480872  |
| H | -9.607809 | -2.783092 | 0.838792  |
| H | -8.996362 | -3.805276 | -0.501566 |
| H | -8.565513 | -4.204770 | 1.168916  |
| C | 2.818901  | 4.927678  | -0.894526 |
| H | 3.697012  | 4.486738  | -0.418678 |
| H | 3.005417  | 4.985116  | -1.970218 |
| H | 2.612620  | 5.916611  | -0.491678 |

## 7. Compound PDI-EDOT-2

|   |           |           |          |
|---|-----------|-----------|----------|
| C | -5.530447 | -2.842035 | 0.118985 |
| C | -5.971839 | -1.503636 | 0.249837 |
| C | -7.344432 | -1.237893 | 0.473005 |
| C | -8.332922 | -2.339373 | 0.578414 |
| C | -6.488498 | -3.968432 | 0.214134 |
| N | -7.832571 | -3.643516 | 0.438600 |
| C | -7.775725 | 0.071441  | 0.596430 |
| C | -6.867982 | 1.131199  | 0.492529 |

|   |           |           |           |
|---|-----------|-----------|-----------|
| C | -5.506331 | 0.918735  | 0.267468  |
| C | -5.036774 | -0.427679 | 0.155471  |
| C | -3.653994 | -0.723064 | -0.052989 |
| C | -4.190651 | -3.105392 | -0.106621 |
| C | -3.267544 | -2.057648 | -0.192240 |
| C | -4.547687 | 2.026750  | 0.136217  |
| C | -3.159678 | 1.735039  | -0.042315 |
| C | -2.692296 | 0.387672  | -0.115155 |
| C | -2.205121 | 2.796902  | -0.151862 |
| C | -0.809005 | 2.532832  | -0.302951 |
| C | -1.328836 | 0.168095  | -0.217474 |
| C | -0.359324 | 1.197048  | -0.296608 |
| C | -4.026650 | 4.399688  | 0.057435  |
| C | -2.676646 | 4.135321  | -0.107675 |
| C | -4.949850 | 3.362141  | 0.181410  |
| C | -1.762058 | 5.288853  | -0.246425 |
| C | 0.112332  | 3.678169  | -0.550285 |
| N | -0.422441 | 4.975609  | -0.477176 |
| H | -8.829921 | 0.258099  | 0.771476  |
| H | -7.254996 | 2.137885  | 0.594136  |
| H | -5.994163 | 3.620402  | 0.307397  |
| H | -4.346054 | 5.435803  | 0.086889  |
| H | -0.953725 | -0.846280 | -0.191361 |
| H | -2.230760 | -2.311124 | -0.378712 |
| H | -3.873287 | -4.137266 | -0.213684 |
| O | -6.147976 | -5.139243 | 0.105661  |
| O | -9.522514 | -2.130001 | 0.776256  |
| O | -2.151192 | 6.448937  | -0.180319 |
| O | 1.299274  | 3.562024  | -0.822364 |
| C | 1.041932  | 0.751607  | -0.320959 |
| C | 2.108014  | 1.197429  | 0.425823  |
| C | 3.270992  | 0.421957  | 0.212031  |
| C | 3.107322  | -0.611868 | -0.699273 |
| C | 4.280733  | -1.386089 | -0.944567 |
| C | 5.362865  | -0.927529 | -0.181785 |
| S | 1.486149  | -0.656119 | -1.316135 |
| S | 4.905001  | 0.468128  | 0.819764  |
| H | 2.047399  | 2.053354  | 1.083584  |
| C | 6.707668  | -1.441051 | -0.125274 |
| C | 7.758838  | -0.959386 | 0.637775  |
| C | 8.978152  | -1.687662 | 0.487883  |
| C | 8.864635  | -2.731540 | -0.384554 |

|   |           |           |           |
|---|-----------|-----------|-----------|
| O | 7.657213  | 0.126583  | 1.457647  |
| O | 10.117321 | -1.359853 | 1.170952  |
| S | 7.263634  | -2.844493 | -1.046628 |
| H | 9.636875  | -3.429783 | -0.674276 |
| H | 8.586578  | -0.518894 | 3.200616  |
| H | 10.898305 | 0.046947  | 2.410158  |
| H | 10.208003 | 0.701128  | 0.896704  |
| C | 8.737156  | 0.217598  | 2.400409  |
| C | 10.067829 | -0.030649 | 1.704290  |
| H | 8.688857  | 1.225529  | 2.818305  |
| C | 0.530059  | 6.070307  | -0.696527 |
| H | 1.344670  | 5.997910  | 0.027577  |
| H | 0.957178  | 5.992453  | -1.699087 |
| H | -0.007851 | 7.008042  | -0.579369 |
| C | -8.763072 | -4.774129 | 0.530610  |
| H | -8.726698 | -5.354417 | -0.394369 |
| H | -8.467649 | -5.426301 | 1.356015  |
| H | -9.761268 | -4.375223 | 0.695183  |
| C | 4.291130  | -2.472648 | -1.853533 |
| C | 4.223601  | -3.386851 | -2.644935 |
| H | 4.194646  | -4.196117 | -3.338726 |

## 8. Compound PDI-EDOT-3

|   |           |           |           |
|---|-----------|-----------|-----------|
| C | -6.359241 | 0.466583  | 0.579610  |
| C | -5.293727 | -0.380839 | 0.190181  |
| C | -5.544279 | -1.752804 | -0.052348 |
| C | -6.907758 | -2.312263 | 0.097333  |
| C | -7.736596 | -0.058421 | 0.746876  |
| N | -7.919218 | -1.426828 | 0.491542  |
| C | -4.507734 | -2.582745 | -0.442920 |
| C | -3.211008 | -2.077276 | -0.583239 |
| C | -2.912185 | -0.736221 | -0.334897 |
| C | -3.973933 | 0.145632  | 0.040024  |
| C | -3.748772 | 1.541554  | 0.261712  |
| C | -6.115778 | 1.809633  | 0.809171  |
| C | -4.829601 | 2.336296  | 0.648613  |
| C | -1.549088 | -0.199056 | -0.451451 |
| C | -1.333113 | 1.206757  | -0.288518 |
| C | -2.398309 | 2.090061  | 0.064516  |

|   |           |           |           |
|---|-----------|-----------|-----------|
| C | -0.013952 | 1.725357  | -0.478158 |
| C | 0.218055  | 3.114775  | -0.310444 |
| C | -2.116872 | 3.450286  | 0.216155  |
| C | -0.827324 | 3.954757  | 0.036213  |
| C | 0.864092  | -0.520072 | -0.821105 |
| C | 1.067802  | 0.867992  | -0.813162 |
| C | -0.448823 | -1.017290 | -0.665010 |
| C | 2.343547  | 1.473753  | -1.276180 |
| C | 1.569915  | 3.696560  | -0.483864 |
| N | 2.560323  | 2.822128  | -0.936502 |
| H | -4.722837 | -3.628367 | -0.636466 |
| H | -2.431259 | -2.758537 | -0.903148 |
| H | -0.563770 | -2.094745 | -0.665604 |
| H | -0.619075 | 5.011289  | 0.167352  |
| H | -2.903143 | 4.147351  | 0.479466  |
| H | -4.690598 | 3.394367  | 0.835141  |
| H | -6.942470 | 2.444065  | 1.110676  |
| O | -8.669436 | 0.656762  | 1.088572  |
| O | -7.166960 | -3.491393 | -0.106612 |
| O | 3.175963  | 0.881535  | -1.944930 |
| O | 1.811014  | 4.879474  | -0.271636 |
| C | 1.946086  | -1.485010 | -0.893893 |
| C | 2.069560  | -2.724825 | -1.478258 |
| C | 3.387519  | -3.175562 | -1.206804 |
| C | 3.987821  | -2.189394 | -0.449609 |
| H | 1.318828  | -3.223965 | -2.075135 |
| H | 3.850167  | -4.093455 | -1.541075 |
| C | 5.291252  | -2.048570 | 0.134113  |
| C | 5.869755  | -0.922465 | 0.685851  |
| C | 7.209387  | -1.147067 | 1.148436  |
| C | 7.645501  | -2.424209 | 0.940252  |
| S | 6.417720  | -3.396219 | 0.184614  |
| O | 5.254538  | 0.288637  | 0.796194  |
| O | 7.960680  | -0.158689 | 1.720375  |
| H | 8.609050  | -2.838960 | 1.198104  |
| C | 6.175831  | 1.354261  | 1.068491  |
| C | 7.161238  | 0.949438  | 2.154900  |
| H | 5.566786  | 2.204867  | 1.383555  |
| H | 6.717760  | 1.615986  | 0.149538  |
| H | 6.617531  | 0.679874  | 3.070928  |
| H | 7.858712  | 1.761249  | 2.374855  |
| C | -9.260318 | -2.003081 | 0.638242  |

|   |           |           |           |
|---|-----------|-----------|-----------|
| H | -9.935580 | -1.208063 | 0.945746  |
| H | -9.580108 | -2.434767 | -0.313165 |
| H | -9.237038 | -2.800032 | 1.385319  |
| C | 3.874638  | 3.376254  | -1.272148 |
| H | 4.631149  | 2.619416  | -1.065735 |
| H | 3.924103  | 3.635931  | -2.334402 |
| H | 4.028779  | 4.271532  | -0.672258 |
| O | 3.105479  | -1.174989 | -0.242572 |

## 9. Compound PDI-EDOT-4

|   |           |           |           |
|---|-----------|-----------|-----------|
| C | 4.170521  | -2.330302 | 0.000979  |
| C | 4.406989  | -0.934872 | 0.001726  |
| C | 5.738096  | -0.451731 | 0.001386  |
| C | 6.893453  | -1.382230 | -0.000094 |
| C | 5.298289  | -3.290827 | -0.000464 |
| N | 6.591641  | -2.753502 | -0.001063 |
| C | 5.969985  | 0.912584  | 0.002370  |
| C | 4.900568  | 1.814761  | 0.003566  |
| C | 3.571800  | 1.386515  | 0.003692  |
| C | 3.308647  | -0.020326 | 0.002791  |
| C | 1.974465  | -0.535254 | 0.002935  |
| C | 2.871547  | -2.807436 | 0.001594  |
| C | 1.791155  | -1.919342 | 0.002584  |
| C | 2.441547  | 2.328293  | 0.004527  |
| C | 1.108535  | 1.818410  | 0.003834  |
| C | 0.845729  | 0.409283  | 0.003132  |
| C | 0.001180  | 2.724545  | 0.003764  |
| C | -1.336547 | 2.249425  | 0.002266  |
| C | -0.469598 | -0.022085 | 0.002208  |
| C | -1.577741 | 0.865904  | 0.001344  |
| C | 1.548468  | 4.596150  | 0.006271  |
| C | 0.246671  | 4.121134  | 0.005182  |
| C | 2.628885  | 3.713360  | 0.005799  |
| C | -0.862308 | 5.103697  | 0.005704  |
| C | -2.466423 | 3.202973  | 0.001782  |
| N | -2.155337 | 4.572074  | 0.004618  |
| H | 6.995460  | 1.266454  | 0.002138  |
| H | 5.133647  | 2.872606  | 0.004304  |
| H | 3.627674  | 4.132395  | 0.006459  |

|   |           |           |           |
|---|-----------|-----------|-----------|
| H | 1.705470  | 5.669409  | 0.007424  |
| H | -0.706934 | -1.078177 | 0.001528  |
| H | 0.792040  | -2.338018 | 0.003079  |
| H | 2.711299  | -3.880428 | 0.001210  |
| O | 5.135785  | -4.504492 | -0.001110 |
| O | 8.050958  | -0.984223 | -0.000592 |
| O | -0.664144 | 6.312941  | 0.007167  |
| O | -3.640586 | 2.855163  | -0.000694 |
| C | -2.858004 | 0.271042  | -0.000273 |
| C | -3.875743 | -0.401298 | -0.003045 |
| C | -5.090102 | -1.082011 | -0.006851 |
| C | -5.299324 | -2.451415 | -0.011598 |
| C | -6.681104 | -2.814426 | -0.019728 |
| C | -7.518380 | -1.731638 | -0.029490 |
| S | -6.641294 | -0.235763 | -0.024942 |
| O | -4.295514 | -3.367606 | 0.003221  |
| O | -7.094182 | -4.118293 | -0.025464 |
| C | -4.750191 | -4.689573 | -0.331764 |
| C | -6.052376 | -5.011936 | 0.388821  |
| H | -3.952013 | -5.370263 | -0.026583 |
| H | -4.894442 | -4.761060 | -1.417935 |
| H | -5.907364 | -4.935953 | 1.475386  |
| H | -6.395872 | -6.018865 | 0.140184  |
| H | -8.599164 | -1.750070 | -0.032427 |
| C | -3.300256 | 5.489082  | 0.004994  |
| H | -3.912200 | 5.312472  | -0.882748 |
| H | -3.917317 | 5.304783  | 0.887550  |
| H | -2.914419 | 6.505811  | 0.010306  |
| C | 7.693207  | -3.722421 | -0.002713 |
| H | 8.628562  | -3.167708 | -0.003943 |
| H | 7.623184  | -4.358773 | 0.882719  |
| H | 7.620604  | -4.358547 | -0.888081 |

## 10. Compound PDI-EDOT-5

|   |            |          |           |
|---|------------|----------|-----------|
| C | -7.206497  | 3.567960 | 0.029954  |
| C | -7.916219  | 2.346644 | -0.059750 |
| C | -9.325078  | 2.365280 | -0.199888 |
| C | -10.074543 | 3.644719 | -0.260717 |
| C | -7.920817  | 4.865437 | -0.021224 |



|   |            |           |           |
|---|------------|-----------|-----------|
| N | -9.312955  | 4.820241  | -0.168992 |
| C | -10.019946 | 1.171179  | -0.282004 |
| C | -9.341282  | -0.050810 | -0.221381 |
| C | -7.953698  | -0.119401 | -0.080972 |
| C | -7.214446  | 1.103222  | -0.007303 |
| C | -5.790230  | 1.112872  | 0.121552  |
| C | -5.830135  | 3.554960  | 0.173254  |
| C | -7.233134  | -1.398882 | -0.000021 |
| C | -5.807382  | -1.391886 | 0.111062  |
| C | -5.070105  | -0.168463 | 0.149424  |
| C | -5.091533  | -2.628215 | 0.186162  |
| C | -3.671299  | -2.651229 | 0.280167  |
| C | -3.683202  | -0.233905 | 0.178898  |
| C | -2.959109  | -1.445134 | 0.226696  |
| C | -7.195577  | -3.834368 | 0.046999  |
| C | -5.815385  | -3.847873 | 0.157153  |
| C | -7.894041  | -2.627694 | -0.029231 |
| C | -5.131320  | -5.159219 | 0.242417  |
| C | -2.984963  | -3.944089 | 0.547238  |
| N | -3.747129  | -5.116463 | 0.429591  |
| H | -11.098757 | 1.202915  | -0.391217 |
| H | -9.929612  | -0.958032 | -0.287486 |
| H | -8.973463  | -2.669783 | -0.109529 |
| H | -7.719829  | -4.783603 | 0.021155  |
| H | -5.305228  | 4.501439  | 0.248199  |
| O | -7.344407  | 5.942353  | 0.058601  |
| O | -11.291596 | 3.680651  | -0.384418 |
| O | -5.738798  | -6.220395 | 0.174078  |
| O | -1.809777  | -4.030569 | 0.873389  |
| C | -1.492717  | -1.317548 | 0.161233  |
| C | 0.642158   | -0.518232 | 0.566515  |
| C | 0.899309   | -1.284020 | -0.569478 |
| C | 2.254962   | -1.280512 | -0.982121 |
| C | 3.046522   | -0.507432 | -0.155878 |
| S | -0.557688  | -2.041890 | -1.149616 |
| S | 2.100990   | 0.243058  | 1.146552  |
| C | 4.466413   | -0.266723 | -0.247915 |
| C | 5.322673   | 0.187395  | 0.736232  |
| C | 6.656103   | 0.297949  | 0.274787  |
| C | 6.835201   | -0.071720 | -1.057438 |
| C | 8.169203   | 0.025120  | -1.515016 |
| C | 9.027780   | 0.472468  | -0.526962 |

|   |            |           |           |
|---|------------|-----------|-----------|
| S | 5.320689   | -0.551881 | -1.779053 |
| S | 8.167907   | 0.780029  | 0.999303  |
| H | 2.647536   | -1.838208 | -1.824315 |
| H | 4.997532   | 0.404335  | 1.747322  |
| H | 8.495607   | -0.218704 | -2.519368 |
| C | 10.450195  | 0.683045  | -0.636914 |
| C | 11.340412  | 1.118916  | 0.321962  |
| C | 12.695735  | 1.204666  | -0.134036 |
| C | 12.844327  | 0.831679  | -1.438305 |
| S | 11.319651  | 0.368572  | -2.138283 |
| O | 10.975109  | 1.456120  | 1.594246  |
| O | 13.716909  | 1.604192  | 0.683050  |
| C | 12.093611  | 1.511130  | 2.492476  |
| C | 13.244729  | 2.278387  | 1.857184  |
| H | 13.756047  | 0.808723  | -2.017225 |
| H | 12.413399  | 0.491029  | 2.743694  |
| H | 11.733979  | 2.012329  | 3.393913  |
| H | 12.916286  | 3.294094  | 1.596786  |
| H | 14.097449  | 2.338255  | 2.537861  |
| C | -9.998577  | 6.116393  | -0.222589 |
| H | -9.818068  | 6.666106  | 0.704388  |
| H | -9.602164  | 6.705407  | -1.052854 |
| H | -11.061422 | 5.929150  | -0.356327 |
| C | -3.020820  | -6.376468 | 0.626049  |
| H | -3.704348  | -7.193807 | 0.408273  |
| H | -2.156184  | -6.402251 | -0.039875 |
| H | -2.661932  | -6.443297 | 1.656508  |
| C | -5.134797  | 2.341869  | 0.218620  |
| H | -4.058531  | 2.379283  | 0.337577  |
| C | -0.716488  | -0.520588 | 0.971360  |
| H | -1.114240  | 0.009245  | 1.829102  |
| H | -3.093739  | 0.672640  | 0.125702  |

## 11. Compound PDI-BDT-1

|   |          |           |           |
|---|----------|-----------|-----------|
| C | 5.823009 | -2.722130 | 0.107239  |
| C | 6.097726 | -1.381401 | -0.253613 |
| C | 7.395795 | -1.028558 | -0.695117 |
| C | 8.477146 | -2.040789 | -0.790288 |
| C | 6.877682 | -3.760438 | 0.027590  |

|   |           |           |           |
|---|-----------|-----------|-----------|
| N | 8.140454  | -3.352143 | -0.419983 |
| C | 7.665970  | 0.282804  | -1.045248 |
| C | 6.668407  | 1.260225  | -0.960484 |
| C | 5.375045  | 0.960797  | -0.527849 |
| C | 5.071324  | -0.390917 | -0.171208 |
| C | 3.766640  | -0.776032 | 0.269415  |
| C | 4.557436  | -3.071212 | 0.544535  |
| C | 3.545731  | -2.108205 | 0.624238  |
| C | 4.324057  | 1.984086  | -0.421498 |
| C | 3.015028  | 1.599370  | 0.007667  |
| C | 2.708722  | 0.242815  | 0.335315  |
| C | 1.982105  | 2.583257  | 0.116890  |
| C | 0.667280  | 2.226882  | 0.530677  |
| C | 1.401253  | -0.073785 | 0.680255  |
| C | 0.364661  | 0.880113  | 0.772236  |
| C | 3.550655  | 4.285723  | -0.619699 |
| C | 2.278599  | 3.933485  | -0.201658 |
| C | 4.558746  | 3.325397  | -0.726404 |
| C | 1.254382  | 4.998903  | -0.100086 |
| C | -0.323241 | 3.303892  | 0.802356  |
| N | 0.008486  | 4.605017  | 0.395765  |
| H | 8.664954  | 0.536242  | -1.383699 |
| H | 6.929713  | 2.272618  | -1.243929 |
| H | 5.538545  | 3.652081  | -1.053003 |
| H | 3.744359  | 5.325135  | -0.861839 |
| H | 1.119428  | -1.102858 | 0.863570  |
| H | 2.572028  | -2.425564 | 0.977849  |
| H | 4.368226  | -4.102710 | 0.822292  |
| O | 6.680158  | -4.929256 | 0.332728  |
| O | 9.604399  | -1.754164 | -1.170785 |
| O | 1.484280  | 6.160477  | -0.412213 |
| O | -1.391553 | 3.113356  | 1.365980  |
| C | -0.972299 | 0.339097  | 1.077567  |
| C | -1.299057 | -0.482688 | 2.131626  |
| C | -2.640479 | -0.941295 | 2.098855  |
| C | -3.343134 | -0.496439 | 0.997826  |
| S | -2.324506 | 0.507084  | -0.015628 |
| H | -0.597831 | -0.718121 | 2.925015  |
| H | -3.085661 | -1.560522 | 2.869913  |
| C | -4.716281 | -0.769547 | 0.632893  |
| C | -5.522762 | -0.072259 | -0.224751 |
| C | -6.841108 | -0.618452 | -0.360810 |

|   |            |           |           |
|---|------------|-----------|-----------|
| C | -7.022967  | -1.782819 | 0.445930  |
| S | -5.550401  | -2.174897 | 1.328026  |
| C | -7.903602  | -0.147176 | -1.144975 |
| C | -9.104871  | -0.844539 | -1.107159 |
| C | -9.285428  | -2.009214 | -0.301805 |
| C | -8.223482  | -2.478120 | 0.485306  |
| C | -10.613322 | -2.550791 | -0.433814 |
| C | -11.395307 | -1.841610 | -1.286808 |
| S | -10.577580 | -0.460677 | -1.995165 |
| H | -5.199551  | 0.830025  | -0.733429 |
| H | -7.780959  | 0.738865  | -1.760844 |
| H | -8.346762  | -3.361732 | 1.104690  |
| H | -10.951208 | -3.435103 | 0.095763  |
| H | -12.424888 | -2.040365 | -1.555709 |
| C | 9.168235   | -4.396870 | -0.493349 |
| H | 10.084692  | -3.941343 | -0.860991 |
| H | 9.323298   | -4.829135 | 0.498101  |
| H | 8.834989   | -5.191267 | -1.165230 |
| C | -1.020816  | 5.627961  | 0.614742  |
| H | -1.956447  | 5.302701  | 0.155881  |
| H | -1.192488  | 5.760720  | 1.686167  |
| H | -0.670357  | 6.555619  | 0.168350  |

## 12. Compound PDI-BDT-2

|   |          |           |           |
|---|----------|-----------|-----------|
| C | 6.034048 | -3.408924 | -0.028732 |
| C | 6.667605 | -2.146174 | 0.063177  |
| C | 8.072178 | -2.079295 | 0.224884  |
| C | 8.886541 | -3.314997 | 0.304293  |
| C | 6.817049 | -4.668385 | 0.039933  |
| N | 8.204252 | -4.534306 | 0.205634  |
| C | 8.695504 | -0.847058 | 0.310585  |
| C | 7.947187 | 0.332534  | 0.229558  |
| C | 6.560576 | 0.317909  | 0.065402  |
| C | 5.895073 | -0.946549 | -0.008136 |
| C | 4.476000 | -1.040712 | -0.154903 |
| C | 4.661190 | -3.476461 | -0.191732 |
| C | 3.896089 | -2.306742 | -0.253756 |
| C | 5.767733 | 1.551953  | -0.041195 |
| C | 4.345694 | 1.460105  | -0.166588 |

|   |            |           |           |
|---|------------|-----------|-----------|
| C | 3.681890   | 0.195405  | -0.198073 |
| C | 3.560448   | 2.651967  | -0.262118 |
| C | 2.142602   | 2.590803  | -0.365133 |
| C | 2.293121   | 0.179231  | -0.237475 |
| C | 1.503214   | 1.346302  | -0.304312 |
| C | 5.587682   | 3.981020  | -0.120505 |
| C | 4.210331   | 3.912617  | -0.241969 |
| C | 6.354610   | 2.817744  | -0.022458 |
| C | 3.450171   | 5.180208  | -0.347257 |
| C | 1.379042   | 3.838753  | -0.639322 |
| N | 2.070733   | 5.054415  | -0.536180 |
| H | 9.772438   | -0.815771 | 0.437954  |
| H | 8.479774   | 1.273335  | 0.299466  |
| H | 7.428967   | 2.924518  | 0.066167  |
| H | 6.056033   | 4.959227  | -0.102193 |
| H | 2.825701   | -2.408978 | -0.387570 |
| H | 4.192844   | -4.451870 | -0.268858 |
| O | 6.286905   | -5.768155 | -0.042596 |
| O | 10.101903  | -3.298774 | 0.448426  |
| O | 3.994103   | 6.275683  | -0.291253 |
| O | 0.198718   | 3.850459  | -0.957914 |
| C | 0.043271   | 1.140410  | -0.247724 |
| C | -0.695575  | 0.343809  | -1.089966 |
| C | -2.053191  | 0.268074  | -0.680653 |
| C | -2.331921  | 0.973676  | 0.480051  |
| C | -3.689415  | 0.889247  | 0.922912  |
| C | -4.456285  | 0.103307  | 0.060235  |
| S | -0.915062  | 1.770662  | 1.093579  |
| S | -3.479614  | -0.538088 | -1.273245 |
| H | -0.278463  | -0.133350 | -1.968993 |
| C | -5.860533  | -0.234743 | 0.112480  |
| C | -6.598391  | -0.813440 | -0.891470 |
| C | -7.960185  | -1.075939 | -0.545984 |
| C | -8.255795  | -0.666795 | 0.788790  |
| C | -9.518869  | -0.817029 | 1.346123  |
| C | -10.524655 | -1.395896 | 0.559443  |
| C | -10.228116 | -1.804808 | -0.776787 |
| C | -8.966726  | -1.651806 | -1.336533 |
| C | -11.896926 | -1.660180 | 0.907389  |
| C | -12.601454 | -2.233834 | -0.100843 |
| S | -6.844302  | 0.031422  | 1.571342  |
| S | -11.651396 | -2.497569 | -1.552036 |

|   |            |           |           |
|---|------------|-----------|-----------|
| H | -6.189169  | -1.042333 | -1.869944 |
| H | -12.321355 | -1.423666 | 1.877202  |
| H | -13.643176 | -2.528155 | -0.091445 |
| H | -9.730768  | -0.499609 | 2.363061  |
| H | -8.754832  | -1.965913 | -2.354360 |
| C | 1.271289   | 6.267740  | -0.743724 |
| H | 0.903534   | 6.300001  | -1.772654 |
| H | 0.410449   | 6.252047  | -0.072558 |
| H | 1.907514   | 7.125996  | -0.540592 |
| C | 9.030310   | -5.744639 | 0.283107  |
| H | 9.558361   | -5.767354 | 1.239347  |
| H | 8.373939   | -6.606267 | 0.186486  |
| H | 9.772724   | -5.732953 | -0.518308 |
| H | 1.755862   | -0.759116 | -0.180852 |
| C | -4.145943  | 1.554719  | 2.087969  |
| C | -4.460396  | 2.147048  | 3.095637  |
| H | -4.768753  | 2.661849  | 3.977216  |

### 13. Compound PDI-BDT-3

|   |          |           |           |
|---|----------|-----------|-----------|
| C | 6.334100 | -2.027285 | -0.109091 |
| C | 6.208408 | -0.651828 | -0.418490 |
| C | 7.321557 | 0.052867  | -0.937078 |
| C | 8.620486 | -0.625849 | -1.169460 |
| C | 7.616640 | -2.738296 | -0.322999 |
| N | 8.679647 | -1.990398 | -0.844997 |
| C | 7.200592 | 1.399326  | -1.233514 |
| C | 5.991329 | 2.068735  | -1.015737 |
| C | 4.868244 | 1.417503  | -0.502004 |
| C | 4.966079 | 0.021043  | -0.205969 |
| C | 3.852963 | -0.718162 | 0.303020  |
| C | 5.251815 | -2.718074 | 0.407275  |
| C | 4.029676 | -2.068415 | 0.610801  |
| C | 3.599675 | 2.117138  | -0.247733 |
| C | 2.479394 | 1.375635  | 0.239808  |
| C | 2.567240 | -0.030080 | 0.488003  |
| C | 1.236528 | 2.040443  | 0.485066  |
| C | 0.099638 | 1.324731  | 0.952099  |
| C | 1.414550 | -0.709033 | 0.856303  |
| C | 0.173445 | -0.070797 | 1.073115  |

|   |            |           |           |
|---|------------|-----------|-----------|
| C | 2.235404   | 4.136261  | -0.228967 |
| C | 1.139377   | 3.435312  | 0.245631  |
| C | 3.448010   | 3.487246  | -0.469831 |
| C | -0.120415  | 4.176804  | 0.487005  |
| C | -1.089056  | 2.086880  | 1.419427  |
| N | -1.164503  | 3.441171  | 1.054838  |
| H | 8.061820   | 1.923937  | -1.633324 |
| H | 5.947626   | 3.123238  | -1.260084 |
| H | 4.277675   | 4.080197  | -0.835220 |
| H | 2.127960   | 5.200327  | -0.410135 |
| H | 1.425096   | -1.788529 | 0.943076  |
| H | 3.211927   | -2.645171 | 1.026645  |
| H | 5.371869   | -3.768892 | 0.648801  |
| O | 7.766908   | -3.925347 | -0.064351 |
| O | 9.592623   | -0.034182 | -1.619654 |
| O | -0.238904  | 5.368565  | 0.230387  |
| O | -1.975573  | 1.606821  | 2.110717  |
| C | -0.960953  | -0.941003 | 1.355599  |
| C | -1.071352  | -2.087576 | 2.107082  |
| C | -2.414415  | -2.531287 | 1.982188  |
| C | -3.042183  | -1.637615 | 1.143468  |
| H | -0.289845  | -2.528100 | 2.710249  |
| H | -2.873127  | -3.384445 | 2.461685  |
| C | -4.381740  | -1.521228 | 0.636769  |
| C | -4.912781  | -0.462430 | -0.047095 |
| C | -6.287742  | -0.644476 | -0.405727 |
| C | -6.796454  | -1.902775 | 0.041484  |
| S | -5.552102  | -2.826899 | 0.880977  |
| C | -7.131906  | 0.235222  | -1.098815 |
| C | -8.444569  | -0.159055 | -1.326051 |
| C | -8.951301  | -1.416751 | -0.879334 |
| C | -8.107658  | -2.296373 | -0.184949 |
| C | -10.335738 | -1.592582 | -1.234130 |
| C | -10.851023 | -0.533662 | -1.909017 |
| S | -9.692886  | 0.758559  | -2.165292 |
| H | -4.338809  | 0.429950  | -0.267651 |
| H | -6.759730  | 1.195518  | -1.443251 |
| H | -8.479915  | -3.255813 | 0.162176  |
| H | -10.905978 | -2.481221 | -0.985688 |
| H | -11.860197 | -0.419951 | -2.283879 |
| C | 9.938631   | -2.715222 | -1.051417 |
| H | 10.661977  | -2.019822 | -1.470653 |

|   |           |           |           |
|---|-----------|-----------|-----------|
| H | 10.294238 | -3.112397 | -0.097583 |
| H | 9.770318  | -3.554275 | -1.730485 |
| C | -2.391576 | 4.144513  | 1.444451  |
| H | -3.256956 | 3.574124  | 1.101866  |
| H | -2.446735 | 4.229021  | 2.533236  |
| H | -2.370385 | 5.132163  | 0.989451  |
| O | -2.154120 | -0.679690 | 0.747129  |

#### 14. Compound PDI-BDT-4

|   |           |           |           |
|---|-----------|-----------|-----------|
| C | 5.011284  | -2.880811 | 0.000098  |
| C | 5.424178  | -1.527253 | 0.000004  |
| C | 6.806235  | -1.219056 | -0.000124 |
| C | 7.833219  | -2.290288 | -0.000129 |
| C | 6.007157  | -3.978382 | 0.000042  |
| N | 7.358703  | -3.611410 | -0.000117 |
| C | 7.211448  | 0.103993  | -0.000243 |
| C | 6.266482  | 1.135834  | -0.000229 |
| C | 4.893745  | 0.881410  | -0.000067 |
| C | 4.452284  | -0.479551 | 0.000033  |
| C | 3.062982  | -0.818877 | 0.000136  |
| C | 3.662084  | -3.187663 | 0.000207  |
| C | 2.704313  | -2.167989 | 0.000216  |
| C | 3.893974  | 1.960314  | -0.000008 |
| C | 2.505169  | 1.625932  | 0.000058  |
| C | 2.064935  | 0.262924  | 0.000134  |
| C | 1.524040  | 2.667860  | 0.000066  |
| C | 0.135159  | 2.371783  | 0.000103  |
| C | 0.703622  | 0.005657  | 0.000190  |
| C | -0.278571 | 1.028916  | 0.000171  |
| C | 3.300498  | 4.324386  | 0.000005  |
| C | 1.949595  | 4.020190  | 0.000027  |
| C | 4.257986  | 3.309044  | -0.000014 |
| C | 0.973745  | 5.131786  | 0.000010  |
| C | -0.869656 | 3.463504  | 0.000103  |
| N | -0.376226 | 4.780270  | -0.000050 |
| H | 8.273845  | 0.323212  | -0.000348 |
| H | 6.633964  | 2.154822  | -0.000355 |
| H | 5.302328  | 3.596461  | -0.000037 |
| H | 3.594171  | 5.368692  | -0.000001 |



|   |            |           |           |
|---|------------|-----------|-----------|
| H | 0.333313   | -1.011401 | 0.000256  |
| H | 1.660115   | -2.456851 | 0.000278  |
| H | 3.365061   | -4.231104 | 0.000271  |
| O | 5.689440   | -5.160580 | 0.000098  |
| O | 9.031778   | -2.042692 | -0.000118 |
| O | 1.308370   | 6.310447  | 0.000016  |
| O | -2.075080  | 3.252696  | 0.000210  |
| C | -1.631011  | 0.615022  | 0.000156  |
| C | -2.750032  | 0.132708  | 0.000087  |
| C | -4.098113  | -0.242763 | 0.000076  |
| C | -4.633496  | -1.507278 | 0.000159  |
| C | -6.062725  | -1.525884 | 0.000064  |
| C | -6.615231  | -0.206079 | -0.000081 |
| C | -7.986828  | 0.016914  | -0.000192 |
| C | -8.839783  | -1.094847 | -0.000153 |
| C | -8.286023  | -2.412596 | -0.000003 |
| C | -6.917412  | -2.639997 | 0.000100  |
| C | -10.279480 | -1.120845 | -0.000248 |
| C | -10.789087 | -2.378804 | -0.000188 |
| S | -5.354459  | 1.018146  | -0.000107 |
| S | -9.560282  | -3.630308 | 0.000040  |
| H | -4.018509  | -2.400205 | 0.000272  |
| H | -8.395562  | 1.023108  | -0.000315 |
| H | -6.508285  | -3.646020 | 0.000207  |
| H | -10.891156 | -0.225171 | -0.000383 |
| H | -11.833122 | -2.665110 | -0.000242 |
| C | -1.332157  | 5.893656  | -0.000088 |
| H | -2.336057  | 5.476393  | -0.000173 |
| H | -1.171088  | 6.513160  | 0.885355  |
| H | -1.170937  | 6.513191  | -0.885485 |
| C | 8.327059   | -4.713769 | -0.000173 |
| H | 9.325792   | -4.283525 | -0.000332 |
| H | 8.174644   | -5.335285 | 0.885374  |
| H | 8.174404   | -5.335387 | -0.885611 |

### 15. Compound PDI-BDT-5

|   |            |          |           |
|---|------------|----------|-----------|
| C | -8.140451  | 3.714287 | -0.037817 |
| C | -8.885888  | 2.519187 | 0.101736  |
| C | -10.288168 | 2.587203 | 0.285028  |

|   |            |           |           |
|---|------------|-----------|-----------|
| C | -10.993874 | 3.891810  | 0.339624  |
| C | -8.810925  | 5.035520  | 0.005229  |
| N | -10.198459 | 5.039366  | 0.196127  |
| C | -11.018133 | 1.418755  | 0.416304  |
| C | -10.381569 | 0.173937  | 0.361432  |
| C | -9.002283  | 0.056681  | 0.178509  |
| C | -8.226636  | 1.252524  | 0.055871  |
| C | -6.807511  | 1.212901  | -0.115330 |
| C | -6.770433  | 3.653216  | -0.222811 |
| C | -6.116190  | 2.417144  | -0.260993 |
| C | -8.326480  | -1.247220 | 0.100989  |
| C | -6.904698  | -1.289104 | -0.050089 |
| C | -6.130053  | -0.091564 | -0.134195 |
| C | -6.231853  | -2.549676 | -0.120008 |
| C | -4.816316  | -2.621035 | -0.251179 |
| C | -4.747067  | -0.202990 | -0.200514 |
| C | -4.065393  | -1.438125 | -0.243846 |
| C | -8.368904  | -3.683284 | 0.098678  |
| C | -6.993478  | -3.744241 | -0.047861 |
| C | -9.025514  | -2.452871 | 0.171100  |
| C | -6.354556  | -5.078686 | -0.125647 |
| C | -4.177283  | -3.941267 | -0.502421 |
| N | -4.974237  | -5.085010 | -0.345975 |
| H | -12.091251 | 1.488334  | 0.558899  |
| H | -10.996540 | -0.711679 | 0.466668  |
| H | -10.103138 | -2.457999 | 0.281000  |
| H | -8.922891  | -4.614044 | 0.156210  |
| H | -5.043562  | 2.416532  | -0.413942 |
| H | -6.218114  | 4.580109  | -0.335636 |
| O | -8.202641  | 6.090607  | -0.116847 |
| O | -12.204414 | 3.970016  | 0.500897  |
| O | -6.994121  | -6.117787 | -0.023055 |
| O | -3.011386  | -4.072210 | -0.846880 |
| C | -2.593157  | -1.358489 | -0.226768 |
| C | -1.815748  | -0.625253 | -1.092802 |
| C | -0.445906  | -0.654232 | -0.726340 |
| C | -0.181995  | -1.379869 | 0.434197  |
| C | 1.184241   | -1.404400 | 0.808944  |
| C | 1.975706   | -0.693124 | -0.070842 |
| S | -1.646606  | -2.058902 | 1.088137  |
| S | 1.018965   | 0.031272  | -1.378919 |
| C | 3.404778   | -0.493666 | -0.025187 |

|   |            |           |           |
|---|------------|-----------|-----------|
| C | 4.245598   | -0.100158 | -1.048360 |
| C | 5.592755   | -0.013763 | -0.624201 |
| C | 5.797955   | -0.341572 | 0.715649  |
| C | 7.146359   | -0.263719 | 1.136784  |
| C | 7.987806   | 0.128511  | 0.113891  |
| S | 4.289805   | -0.748728 | 1.492022  |
| S | 7.100340   | 0.393266  | -1.400867 |
| H | -2.220673  | -0.118269 | -1.960833 |
| H | 1.581915   | -1.938125 | 1.664265  |
| H | 3.900232   | 0.090736  | -2.057749 |
| H | 7.492253   | -0.467624 | 2.143410  |
| C | 9.417518   | 0.326342  | 0.163574  |
| C | 10.229375  | 0.911251  | -0.771702 |
| C | 11.613794  | 0.948130  | -0.405002 |
| C | 11.843310  | 0.360947  | 0.876258  |
| C | 13.107171  | 0.288845  | 1.444215  |
| C | 14.187971  | 0.815093  | 0.720995  |
| C | 13.959483  | 1.403080  | -0.559463 |
| C | 12.693387  | 1.476214  | -1.127447 |
| C | 15.579201  | 0.858887  | 1.089753  |
| C | 16.361586  | 1.444331  | 0.147717  |
| S | 10.340382  | -0.231019 | 1.577036  |
| S | 15.466852  | 1.987357  | -1.260009 |
| H | 9.855719   | 1.326533  | -1.701971 |
| H | 15.959970  | 0.463551  | 2.025333  |
| H | 17.432404  | 1.598708  | 0.184411  |
| H | 13.265564  | -0.160546 | 2.420224  |
| H | 12.533977  | 1.927349  | -2.102410 |
| C | -4.293451  | -6.371802 | -0.532784 |
| H | -3.951564  | -6.465567 | -1.566836 |
| H | -3.420902  | -6.417160 | 0.121761  |
| H | -5.000864  | -7.162230 | -0.293156 |
| C | -10.840260 | 6.358222  | 0.240553  |
| H | -10.399742 | 6.952052  | 1.044724  |
| H | -10.670989 | 6.881067  | -0.703901 |
| H | -11.903913 | 6.208885  | 0.410589  |
| H | -4.127265  | 0.684519  | -0.183999 |

## 16. Compound PDI-BITHN-1

|   |          |          |           |
|---|----------|----------|-----------|
| C | 3.490422 | 3.940652 | -0.278001 |
|---|----------|----------|-----------|

|   |           |           |           |
|---|-----------|-----------|-----------|
| C | 3.008430  | 2.652713  | 0.070684  |
| C | 1.649672  | 2.486867  | 0.463148  |
| C | 0.818351  | 3.696468  | 0.706017  |
| C | 2.619660  | 5.137088  | -0.220887 |
| N | 1.328638  | 4.929801  | 0.272466  |
| C | 1.158656  | 1.195982  | 0.712357  |
| C | 2.064348  | 0.112180  | 0.679668  |
| C | 3.412473  | 0.245917  | 0.376970  |
| C | 3.901641  | 1.537086  | 0.008382  |
| C | 5.253017  | 1.726897  | -0.417766 |
| C | 4.804168  | 4.105739  | -0.684185 |
| C | 5.672875  | 3.015124  | -0.752941 |
| C | 4.332151  | -0.900601 | 0.388232  |
| C | 5.674380  | -0.714390 | -0.067805 |
| C | 6.152381  | 0.565647  | -0.491664 |
| C | 6.560350  | -1.834680 | -0.096490 |
| C | 7.887239  | -1.682274 | -0.566207 |
| C | 8.322648  | -0.440179 | -0.994285 |
| C | 4.821972  | -3.255916 | 0.811692  |
| C | 6.116493  | -3.103581 | 0.346609  |
| C | 3.944249  | -2.166579 | 0.831119  |
| C | 7.025696  | -4.273721 | 0.326874  |
| C | 8.823749  | -2.832519 | -0.609687 |
| N | 8.324466  | -4.062642 | -0.153424 |
| H | 2.942300  | -2.328403 | 1.210712  |
| H | 4.504502  | -4.234105 | 1.157140  |
| H | 9.340513  | -0.341700 | -1.356267 |
| H | 5.140025  | 5.102642  | -0.948614 |
| O | 3.007015  | 6.247525  | -0.562797 |
| O | -0.267060 | 3.671712  | 1.269896  |
| O | 6.682467  | -5.385667 | 0.706713  |
| O | 9.971749  | -2.721783 | -1.019080 |
| C | 9.205984  | -5.235525 | -0.166654 |
| H | 8.767549  | -6.016560 | -0.792361 |
| H | 9.309617  | -5.627282 | 0.848009  |
| C | 0.448754  | 6.088998  | 0.459866  |
| H | -0.516749 | 5.889599  | -0.009371 |
| H | 0.930651  | 6.951555  | 0.005459  |
| C | 7.466265  | 0.665600  | -0.953432 |
| H | 7.854523  | 1.617245  | -1.295900 |
| H | 6.692329  | 3.196005  | -1.071415 |
| C | -4.121295 | 0.383146  | 0.423141  |

|   |            |           |           |
|---|------------|-----------|-----------|
| C | -6.271005  | 0.887175  | -0.450061 |
| C | -6.483901  | -0.438645 | -0.038784 |
| S | -5.024155  | -1.082590 | 0.662794  |
| C | -4.930502  | 1.360192  | -0.176216 |
| H | 0.282020   | 6.261660  | 1.526309  |
| H | 10.171675  | -4.925908 | -0.559311 |
| H | 1.644099   | -0.868246 | 0.865681  |
| C | -4.589892  | 2.710878  | -0.492464 |
| C | -7.196679  | 1.754819  | -1.104738 |
| C | -5.518378  | 3.520232  | -1.093795 |
| C | -6.820927  | 3.034275  | -1.420928 |
| H | -3.607539  | 3.093647  | -0.237319 |
| H | -5.263250  | 4.550005  | -1.328147 |
| H | -7.522034  | 3.693943  | -1.924552 |
| H | -8.185959  | 1.389361  | -1.358181 |
| C | -7.698607  | -1.221829 | -0.064328 |
| C | -10.079294 | -1.996701 | 0.234221  |
| C | -7.877718  | -2.578235 | -0.377225 |
| C | -9.248853  | -3.017325 | -0.201292 |
| C | -6.911841  | -3.511056 | -0.864424 |
| C | -9.600903  | -4.373197 | -0.486940 |
| C | -7.290113  | -4.801409 | -1.129714 |
| C | -8.638921  | -5.238540 | -0.932398 |
| S | -9.220103  | -0.528716 | 0.446285  |
| H | -11.143824 | -2.044174 | 0.421573  |
| H | -5.890358  | -3.188355 | -1.035814 |
| H | -6.557301  | -5.509691 | -1.506310 |
| H | -8.896173  | -6.271206 | -1.151439 |
| H | -10.628582 | -4.697608 | -0.347937 |
| C | -0.248737  | 0.843554  | 0.956399  |
| C | -2.731927  | 0.435823  | 0.815602  |
| C | -0.731292  | 0.034037  | 1.962248  |
| C | -2.129123  | -0.181914 | 1.896280  |
| S | -1.530739  | 1.286542  | -0.140991 |
| H | -0.097877  | -0.347513 | 2.756087  |
| H | -2.692017  | -0.742725 | 2.634236  |

## 17. Compound PDI-BITHN-2

|   |            |          |          |
|---|------------|----------|----------|
| C | -11.031048 | 0.965253 | 0.594127 |
|---|------------|----------|----------|

|   |           |           |           |
|---|-----------|-----------|-----------|
| S | -9.947898 | -1.430456 | 0.154880  |
| S | -9.441709 | 1.513289  | 0.060967  |
| C | -8.744709 | -0.126147 | -0.032880 |
| C | -7.428698 | -0.354994 | -0.234789 |
| S | -6.228887 | 0.941884  | -0.461118 |
| C | -5.075821 | -1.442707 | -0.126072 |
| C | -4.813202 | -0.115437 | -0.168823 |
| H | -4.320690 | -2.206998 | 0.023321  |
| S | -6.721085 | -1.990385 | -0.319614 |
| C | -3.241577 | 1.837499  | 0.253678  |
| C | -1.869865 | 2.125332  | 0.316160  |
| C | -3.515021 | 0.507026  | -0.041557 |
| C | -1.061912 | 1.017599  | 0.071703  |
| H | -1.467493 | 3.102610  | 0.545428  |
| S | -2.042861 | -0.405463 | -0.266525 |
| C | 0.357969  | 0.944674  | 0.069219  |
| C | 1.238010  | -0.123683 | -0.042033 |
| N | 1.183857  | 2.060365  | 0.309310  |
| C | 2.590491  | 0.345734  | -0.018274 |
| C | 2.589654  | 1.795985  | 0.088681  |
| O | 3.448357  | 2.649490  | 0.033547  |
| C | 1.236978  | -1.575097 | -0.040053 |
| C | 3.469593  | -0.721832 | 0.027240  |
| N | 2.644911  | -1.852829 | 0.171179  |
| O | 0.382690  | -2.427353 | -0.161360 |
| C | 4.897045  | -0.787536 | 0.054402  |
| C | 5.700997  | -1.915825 | 0.222580  |
| S | 5.873366  | 0.649869  | -0.130858 |
| C | 7.072820  | -1.632765 | 0.205514  |
| H | 5.292332  | -2.907961 | 0.356020  |
| C | 7.352598  | -0.280653 | 0.017204  |
| H | 7.838482  | -2.387477 | 0.328291  |
| C | 8.596335  | 0.431734  | -0.068859 |
| C | 9.877297  | -0.036321 | 0.031988  |
| H | 8.494530  | 1.507457  | -0.202838 |
| C | 11.067837 | 0.882249  | -0.006441 |
| O | 10.922456 | 2.036074  | -0.711896 |
| H | 10.160854 | 1.976014  | -1.311315 |
| O | 12.094734 | 0.637041  | 0.573407  |
| C | 10.182700 | -1.405247 | 0.293466  |
| N | 10.406684 | -2.531135 | 0.486704  |
| H | -4.017757 | 2.569835  | 0.444400  |

|   |            |           |           |
|---|------------|-----------|-----------|
| C | -11.257257 | -0.351686 | 0.636386  |
| H | -11.759740 | 1.728419  | 0.840964  |
| H | -12.195883 | -0.811843 | 0.921992  |
| F | 0.745209   | 3.308609  | -0.100759 |
| F | 3.092481   | -3.067010 | -0.322055 |

### 18. Compound PDI-BITHN-3

|   |           |           |           |
|---|-----------|-----------|-----------|
| C | 2.496544  | 3.652650  | -0.256194 |
| C | 2.353567  | 2.311384  | 0.182554  |
| C | 1.111694  | 1.873271  | 0.721123  |
| C | 0.081863  | 2.886613  | 1.057319  |
| C | 1.386260  | 4.625678  | -0.145498 |
| N | 0.237246  | 4.169243  | 0.508078  |
| C | 0.941559  | 0.513814  | 1.034339  |
| C | 2.060404  | -0.346264 | 0.945880  |
| C | 3.311586  | 0.069371  | 0.516463  |
| C | 3.463738  | 1.417507  | 0.061030  |
| C | 4.689800  | 1.876651  | -0.509052 |
| C | 3.694992  | 4.080603  | -0.805008 |
| C | 4.775629  | 3.206618  | -0.928582 |
| C | 4.462810  | -0.843052 | 0.469154  |
| C | 5.679774  | -0.390143 | -0.129569 |
| C | 5.816117  | 0.939855  | -0.639373 |
| C | 6.788129  | -1.287644 | -0.215378 |
| C | 7.997179  | -0.871443 | -0.823666 |
| C | 8.100607  | 0.412261  | -1.330717 |
| C | 5.507676  | -3.005647 | 0.914148  |
| C | 6.684396  | -2.597670 | 0.310281  |
| C | 4.414304  | -2.136723 | 0.992224  |
| C | 7.825843  | -3.538884 | 0.230363  |
| C | 9.158948  | -1.788019 | -0.929711 |
| N | 8.991889  | -3.073709 | -0.390862 |
| H | 3.516379  | -2.493070 | 1.483357  |
| H | 5.452760  | -4.009421 | 1.322119  |
| H | 9.032066  | 0.713915  | -1.797855 |
| H | 3.770690  | 5.110473  | -1.137059 |
| O | 1.469762  | 5.770586  | -0.573349 |
| O | -0.873194 | 2.668994  | 1.792674  |
| O | 7.778327  | -4.677743 | 0.677274  |
| O | 10.210128 | -1.449149 | -1.457240 |

|   |            |           |           |
|---|------------|-----------|-----------|
| C | 10.106731  | -4.024653 | -0.464963 |
| H | 9.787128   | -4.921385 | -1.000884 |
| H | 10.407552  | -4.317491 | 0.543905  |
| C | -0.843370  | 5.123181  | 0.782126  |
| H | -1.800699  | 4.678012  | 0.504104  |
| H | -0.649301  | 6.022840  | 0.202580  |
| C | 7.025515   | 1.302744  | -1.235447 |
| H | 7.156768   | 2.297744  | -1.643320 |
| H | 5.693245   | 3.589407  | -1.358554 |
| C | -3.801483  | -0.198495 | 0.657259  |
| C | -5.651636  | 0.799730  | -0.439896 |
| C | -6.220625  | -0.433199 | -0.077457 |
| S | -5.047591  | -1.402839 | 0.776065  |
| C | -4.277382  | 0.941196  | -0.012364 |
| H | -0.874906  | 5.357838  | 1.849601  |
| H | 10.929315  | -3.538487 | -0.984212 |
| H | 1.889618   | -1.389917 | 1.179566  |
| C | -3.580179  | 2.157664  | -0.275846 |
| C | -6.262021  | 1.856329  | -1.180599 |
| C | -4.215127  | 3.159398  | -0.964514 |
| C | -5.553473  | 3.001965  | -1.435886 |
| H | -2.570388  | 2.280450  | 0.091576  |
| H | -3.690614  | 4.090286  | -1.164277 |
| H | -6.013605  | 3.804639  | -2.005462 |
| H | -7.275624  | 1.738958  | -1.548067 |
| C | -7.573244  | -0.907327 | -0.253423 |
| C | -10.087802 | -1.088663 | -0.254545 |
| C | -8.031161  | -2.191377 | -0.591460 |
| C | -9.478197  | -2.288186 | -0.587808 |
| C | -7.265177  | -3.338525 | -0.961449 |
| C | -10.107129 | -3.528068 | -0.920251 |
| C | -7.906019  | -4.508423 | -1.277196 |
| C | -9.333417  | -4.608181 | -1.248321 |
| S | -8.936595  | 0.139463  | 0.066885  |
| H | -11.147603 | -0.877995 | -0.199232 |
| H | -6.183326  | -3.273113 | -1.005958 |
| H | -7.323449  | -5.379235 | -1.564887 |
| H | -9.801583  | -5.555271 | -1.501909 |
| H | -11.191570 | -3.594885 | -0.909861 |
| C | -0.323712  | -0.112425 | 1.379313  |
| C | -2.500611  | -0.460027 | 1.195371  |
| C | -0.632705  | -1.157436 | 2.223172  |



|   |           |           |          |
|---|-----------|-----------|----------|
| C | -2.027890 | -1.372717 | 2.120595 |
| H | 0.060005  | -1.670912 | 2.875343 |
| H | -2.626134 | -2.082660 | 2.674093 |
| O | -1.457966 | 0.293917  | 0.735184 |

### 19. Compound PDI-BITHN-4

|   |           |           |           |
|---|-----------|-----------|-----------|
| C | -3.060400 | 4.110982  | -0.155571 |
| C | -2.468598 | 2.825617  | -0.063026 |
| C | -1.054442 | 2.707009  | -0.008397 |
| C | -0.207642 | 3.915370  | -0.041588 |
| C | -2.239413 | 5.341522  | -0.189867 |
| N | -0.853701 | 5.157043  | -0.128615 |
| C | -0.471729 | 1.427589  | 0.071288  |
| C | -1.322830 | 0.290260  | 0.115059  |
| C | -2.703095 | 0.374553  | 0.075440  |
| C | -3.311632 | 1.669260  | -0.030918 |
| C | -4.727810 | 1.821361  | -0.106889 |
| C | -4.439798 | 4.238057  | -0.217173 |
| C | -5.260531 | 3.111469  | -0.194467 |
| C | -3.557913 | -0.822092 | 0.136687  |
| C | -4.975974 | -0.665522 | 0.039118  |
| C | -5.582177 | 0.623998  | -0.092752 |
| C | -5.808226 | -1.826774 | 0.075202  |
| C | -7.214496 | -1.700705 | -0.033640 |
| C | -7.779079 | -0.445174 | -0.174112 |
| C | -3.857968 | -3.239332 | 0.327734  |
| C | -5.231706 | -3.110997 | 0.220211  |
| C | -3.035929 | -2.108503 | 0.285480  |
| C | -6.081421 | -4.323978 | 0.261886  |
| C | -8.098032 | -2.892008 | -0.001037 |
| N | -7.464712 | -4.136174 | 0.147151  |
| H | -1.966640 | -2.258129 | 0.375082  |
| H | -3.434929 | -4.231617 | 0.443576  |
| H | -8.857586 | -0.365763 | -0.259817 |
| H | -4.862629 | 5.234608  | -0.285380 |
| O | -2.734761 | 6.459732  | -0.267038 |
| O | 1.018036  | 3.885438  | 0.004099  |
| O | -5.621560 | -5.451503 | 0.389258  |
| O | -9.315052 | -2.803298 | -0.097160 |

|   |           |           |           |
|---|-----------|-----------|-----------|
| C | -8.286722 | -5.350597 | 0.189531  |
| H | -8.122992 | -5.871181 | 1.136110  |
| H | -7.995000 | -6.019193 | -0.623889 |
| C | 0.019620  | 6.334912  | -0.157174 |
| H | 0.628707  | 6.362555  | 0.749540  |
| H | -0.612221 | 7.217587  | -0.222937 |
| C | -6.972077 | 0.697498  | -0.201682 |
| H | -7.461798 | 1.657193  | -0.313650 |
| H | -6.332045 | 3.261663  | -0.244005 |
| C | 3.450162  | 0.589077  | 0.144317  |
| C | 5.793285  | 0.968191  | 0.074035  |
| C | 5.770238  | -0.440685 | 0.153665  |
| S | 4.127335  | -1.015681 | 0.234107  |
| C | 4.477418  | 1.552045  | 0.074824  |
| H | 0.689644  | 6.274914  | -1.018241 |
| H | -9.328397 | -5.054883 | 0.089034  |
| H | -0.829712 | -0.671228 | 0.179318  |
| C | 0.913370  | 1.179692  | 0.106562  |
| C | 2.083726  | 0.825654  | 0.127434  |
| C | 4.308378  | 2.960454  | -0.008560 |
| C | 6.925079  | 1.826910  | -0.048814 |
| C | 5.426588  | 3.752923  | -0.100289 |
| C | 6.734934  | 3.184367  | -0.130045 |
| H | 3.305742  | 3.376674  | -0.001660 |
| H | 5.317953  | 4.832079  | -0.164453 |
| H | 7.594765  | 3.841045  | -0.229645 |
| H | 7.922996  | 1.405450  | -0.097095 |
| C | 6.873984  | -1.365256 | 0.244157  |
| C | 9.010996  | -2.511115 | 0.928948  |
| C | 7.019540  | -2.642097 | -0.326566 |
| C | 8.251035  | -3.294332 | 0.073547  |
| C | 6.155466  | -3.310496 | -1.245658 |
| C | 8.560952  | -4.596990 | -0.425678 |
| C | 6.490316  | -4.557955 | -1.706060 |
| C | 7.693051  | -5.210137 | -1.288267 |
| S | 8.253261  | -1.011154 | 1.258974  |
| H | 9.973149  | -2.748402 | 1.363297  |
| H | 5.249131  | -2.823195 | -1.588147 |
| H | 5.835468  | -5.063021 | -2.410608 |
| H | 7.918297  | -6.200373 | -1.674179 |
| H | 9.483187  | -5.080614 | -0.115933 |

## 20. Compound PDI-BITHN-5

|   |            |           |           |
|---|------------|-----------|-----------|
| C | -9.295640  | 3.463087  | -0.629550 |
| C | -9.983718  | 2.259120  | -0.343799 |
| C | -11.390006 | 2.278384  | -0.184412 |
| C | -12.149917 | 3.544666  | -0.306277 |
| C | -10.023323 | 4.749929  | -0.765375 |
| N | -11.414710 | 4.703383  | -0.587134 |
| C | -12.066190 | 1.102814  | 0.089863  |
| C | -11.369892 | -0.105829 | 0.200784  |
| C | -9.983853  | -0.176398 | 0.046544  |
| C | -9.263987  | 1.031431  | -0.218372 |
| C | -7.841806  | 1.041048  | -0.364252 |
| C | -7.921091  | 3.444995  | -0.791786 |
| C | -7.207433  | 2.248807  | -0.660768 |
| C | -9.245261  | -1.444810 | 0.139280  |
| C | -7.819846  | -1.433188 | 0.021591  |
| C | -7.101557  | -0.217896 | -0.198355 |
| C | -7.085695  | -2.656678 | 0.124273  |
| C | -5.665070  | -2.670563 | 0.037572  |
| C | -5.713399  | -0.264673 | -0.215067 |
| C | -4.972192  | -1.458537 | -0.082753 |
| C | -9.171452  | -3.862297 | 0.433739  |
| C | -7.791052  | -3.870686 | 0.326514  |
| C | -9.887698  | -2.667002 | 0.341311  |
| C | -7.086959  | -5.170307 | 0.427876  |
| C | -4.955732  | -3.976829 | -0.031862 |
| N | -5.702269  | -5.132849 | 0.240944  |
| H | -13.143515 | 1.138407  | 0.212758  |
| H | -11.942510 | -1.000361 | 0.414205  |
| H | -10.966548 | -2.713312 | 0.427025  |
| H | -9.681816  | -4.806170 | 0.592453  |
| H | -6.133700  | 2.281396  | -0.802469 |
| H | -7.411163  | 4.374952  | -1.019486 |
| O | -9.446598  | 5.799298  | -1.017757 |
| O | -13.365162 | 3.603317  | -0.171950 |
| O | -7.678809  | -6.220485 | 0.643002  |
| O | -3.774060  | -4.088696 | -0.325510 |
| C | -3.507162  | -1.302330 | -0.030907 |
| C | -2.731793  | -0.645151 | -0.957699 |

|   |            |           |           |
|---|------------|-----------|-----------|
| C | -1.376713  | -0.559955 | -0.547512 |
| C | -1.124045  | -1.120530 | 0.703521  |
| C | 0.227147   | -1.031509 | 1.121046  |
| C | 1.018578   | -0.399880 | 0.182480  |
| S | -2.579815  | -1.784891 | 1.391403  |
| S | 0.079851   | 0.109014  | -1.235454 |
| C | 2.435767   | -0.131813 | 0.244061  |
| C | 3.300195   | 0.136980  | -0.798955 |
| C | 4.625671   | 0.348922  | -0.349885 |
| C | 4.791403   | 0.238809  | 1.031101  |
| C | 6.123706   | 0.406525  | 1.478212  |
| C | 6.993638   | 0.663479  | 0.434367  |
| S | 3.270441   | -0.113514 | 1.810905  |
| S | 6.145165   | 0.700989  | -1.128364 |
| H | -3.126249  | -0.272002 | -1.895628 |
| H | 0.616848   | -1.434388 | 2.048585  |
| H | 2.987740   | 0.153114  | -1.836636 |
| H | 6.455565   | 0.297719  | 2.502954  |
| C | 8.417386   | 0.888865  | 0.511082  |
| C | 10.931737  | 0.833786  | 0.126336  |
| H | -5.138169  | 0.649163  | -0.294469 |
| C | 12.239932  | 0.652327  | -0.461230 |
| C | 12.781035  | -0.475316 | -1.097855 |
| C | 14.107407  | -0.233766 | -1.632858 |
| S | 13.374310  | 1.979546  | -0.547536 |
| H | 15.501232  | 1.493347  | -1.660122 |
| C | 14.547507  | 1.058304  | -1.392292 |
| C | -4.955028  | -6.396006 | 0.229331  |
| H | -4.564313  | -6.587572 | -0.773367 |
| H | -4.110642  | -6.323114 | 0.917641  |
| H | -5.634844  | -7.189334 | 0.531141  |
| C | -12.187117 | 5.945658  | -0.702841 |
| H | -12.733324 | 6.123821  | 0.226293  |
| H | -11.491081 | 6.757087  | -0.902104 |
| H | -12.912630 | 5.852984  | -1.514679 |
| C | 9.138648   | 1.553524  | 1.514622  |
| C | 10.569433  | 1.506693  | 1.304230  |
| C | 12.210685  | -1.778271 | -1.230695 |
| C | 14.802910  | -1.286425 | -2.305356 |
| C | 12.911281  | -2.761538 | -1.879152 |
| C | 14.210263  | -2.513804 | -2.427367 |
| C | 8.621390   | 2.260083  | 2.641385  |

|   |           |           |           |
|---|-----------|-----------|-----------|
| C | 11.434922 | 2.095002  | 2.275539  |
| C | 9.485538  | 2.839039  | 3.534236  |
| C | 10.900031 | 2.736481  | 3.362318  |
| H | 12.509741 | 2.019585  | 2.150628  |
| H | 7.547969  | 2.352141  | 2.766781  |
| H | 9.093966  | 3.385346  | 4.387890  |
| H | 11.557525 | 3.180047  | 4.104792  |
| H | 11.234253 | -1.985058 | -0.805704 |
| H | 15.793832 | -1.097307 | -2.709054 |
| H | 12.480089 | -3.754145 | -1.975326 |
| H | 14.730075 | -3.319969 | -2.937694 |
| S | 9.504303  | 0.257720  | -0.691657 |

## 21. Compound PDI-BTAC-1

|   |            |           |           |
|---|------------|-----------|-----------|
| C | -9.442778  | -1.778130 | 0.192591  |
| C | -8.054902  | -1.953702 | -0.025347 |
| C | -7.538125  | -3.256323 | -0.224082 |
| C | -8.432573  | -4.437799 | -0.207222 |
| C | -10.369443 | -2.936995 | 0.218982  |
| N | -9.795391  | -4.201377 | 0.013475  |
| C | -6.183230  | -3.432586 | -0.443559 |
| C | -5.319907  | -2.331854 | -0.460552 |
| C | -5.781746  | -1.029950 | -0.257569 |
| C | -7.180942  | -0.823660 | -0.046615 |
| C | -7.727265  | 0.485497  | 0.138924  |
| C | -9.949004  | -0.504278 | 0.383622  |
| C | -9.101274  | 0.608436  | 0.355070  |
| C | -4.883287  | 0.133674  | -0.257149 |
| C | -5.429411  | 1.445500  | -0.109249 |
| C | -6.831037  | 1.650461  | 0.087829  |
| C | -4.543985  | 2.567838  | -0.161068 |
| C | -5.078090  | 3.874551  | -0.020034 |
| C | -7.301192  | 2.956965  | 0.226112  |
| C | -6.437275  | 4.052840  | 0.174495  |
| C | -2.613410  | 1.095256  | -0.395023 |
| C | -3.142513  | 2.392034  | -0.341633 |
| C | -3.505276  | 0.000860  | -0.365344 |
| C | -2.289589  | 3.588641  | -0.579335 |
| C | -4.214407  | 5.077111  | -0.074067 |

|   |            |           |           |
|---|------------|-----------|-----------|
| N | -2.863418  | 4.848242  | -0.347043 |
| H | -5.807533  | -4.438049 | -0.601247 |
| H | -4.268026  | -2.516281 | -0.643534 |
| H | -3.053847  | -0.982610 | -0.396672 |
| H | -6.813694  | 5.064020  | 0.285694  |
| H | -8.356834  | 3.149121  | 0.374847  |
| H | -9.545963  | 1.584520  | 0.507273  |
| H | -11.014201 | -0.386981 | 0.552127  |
| O | -11.571299 | -2.804683 | 0.408259  |
| O | -8.024841  | -5.579549 | -0.376472 |
| O | -1.134457  | 3.528036  | -0.974800 |
| O | -4.655190  | 6.207837  | 0.090080  |
| C | -1.180968  | 0.748164  | -0.432306 |
| C | -0.574125  | -0.117901 | -1.312016 |
| C | 0.792964   | -0.360707 | -1.017078 |
| C | 1.236652   | 0.293160  | 0.111631  |
| S | -0.055656  | 1.249868  | 0.805559  |
| H | -1.098712  | -0.553193 | -2.156129 |
| H | 1.424870   | -1.023117 | -1.598045 |
| C | 2.577804   | 0.259611  | 0.706326  |
| C | 3.696723   | 0.057477  | -0.112373 |
| C | 4.981014   | 0.003696  | 0.436909  |
| C | 2.770806   | 0.422858  | 2.097076  |
| C | 5.139223   | 0.171665  | 1.830411  |
| C | 4.039422   | 0.386091  | 2.662528  |
| C | 6.250141   | -0.194743 | -0.244623 |
| C | 7.337539   | -0.172379 | 0.649720  |
| C | 8.655108   | -0.360574 | 0.208118  |
| C | 8.898898   | -0.546487 | -1.165893 |
| C | 6.494459   | -0.415327 | -1.605240 |
| C | 7.803032   | -0.584244 | -2.043148 |
| N | 9.727570   | -0.372536 | 1.102059  |
| C | 10.886474  | -1.093812 | 0.781920  |
| C | 11.206429  | -1.297468 | -0.574877 |
| C | 10.361251  | -0.576551 | -1.633862 |
| C | 11.698526  | -1.608300 | 1.799619  |
| C | 12.833247  | -2.347820 | 1.478908  |
| C | 13.149941  | -2.588942 | 0.141895  |
| C | 12.338121  | -2.064729 | -0.866260 |
| H | 3.568100   | -0.031221 | -1.186666 |
| H | 1.908910   | 0.560817  | 2.743525  |
| H | 4.166221   | 0.512082  | 3.733522  |

|   |            |           |           |
|---|------------|-----------|-----------|
| H | 5.671630   | -0.447558 | -2.312993 |
| H | 7.975486   | -0.740623 | -3.101565 |
| H | 11.428263  | -1.437289 | 2.839759  |
| H | 13.458279  | -2.745302 | 2.273812  |
| H | 14.026887  | -3.174226 | -0.118833 |
| H | 12.606765  | -2.253020 | -1.899955 |
| H | 9.489600   | -0.361418 | 2.085409  |
| C | 10.511534  | -1.214666 | -3.024342 |
| C | 10.858861  | 0.896340  | -1.713745 |
| H | 10.169630  | -2.254968 | -3.030274 |
| H | 11.555280  | -1.189803 | -3.350095 |
| H | 9.942769   | -0.655632 | -3.772853 |
| H | 11.910123  | 0.923528  | -2.023068 |
| H | 10.260686  | 1.458910  | -2.439959 |
| H | 10.774634  | 1.392616  | -0.742243 |
| S | 6.831284   | 0.092523  | 2.329816  |
| C | -1.970913  | 6.000901  | -0.516781 |
| H | -1.076155  | 5.856694  | 0.091672  |
| H | -1.664253  | 6.084540  | -1.562775 |
| H | -2.512699  | 6.891825  | -0.207867 |
| C | -10.662359 | -5.385115 | 0.024025  |
| H | -10.578801 | -5.907995 | -0.931562 |
| H | -10.343547 | -6.066479 | 0.816479  |
| H | -11.683818 | -5.052105 | 0.192328  |

## 22. Compound PDI-BTAC-2

|   |            |           |           |
|---|------------|-----------|-----------|
| C | -7.898509  | -3.607172 | 0.072179  |
| C | -8.590106  | -2.392609 | -0.151154 |
| C | -10.000330 | -2.404285 | -0.276602 |
| C | -10.770838 | -3.668762 | -0.175185 |
| C | -8.633444  | -4.889996 | 0.178243  |
| N | -10.026993 | -4.837974 | 0.047581  |
| C | -10.677115 | -1.217557 | -0.497708 |
| C | -9.977624  | -0.010417 | -0.602527 |
| C | -8.587337  | 0.050572  | -0.488242 |
| C | -7.868621  | -1.163382 | -0.250633 |
| C | -6.445242  | -1.179018 | -0.113194 |
| C | -6.519791  | -3.602122 | 0.189988  |
| C | -5.806053  | -2.402468 | 0.096583  |
| C | -7.842410  | 1.312781  | -0.609931 |

|   |            |           |           |
|---|------------|-----------|-----------|
| C | -6.419269  | 1.301045  | -0.464438 |
| C | -5.708244  | 0.090041  | -0.201265 |
| C | -5.681110  | 2.520770  | -0.583840 |
| C | -4.265703  | 2.540206  | -0.436246 |
| C | -4.334049  | 0.159929  | -0.008573 |
| C | -3.593646  | 1.356883  | -0.106047 |
| C | -7.755928  | 3.720125  | -0.977505 |
| C | -6.377866  | 3.728275  | -0.846171 |
| C | -8.476882  | 2.529450  | -0.862874 |
| C | -5.666997  | 5.021075  | -0.985647 |
| C | -3.520956  | 3.792669  | -0.740505 |
| N | -4.272467  | 4.964514  | -0.914117 |
| H | -11.757674 | -1.243704 | -0.589548 |
| H | -10.551930 | 0.891220  | -0.777891 |
| H | -9.552998  | 2.574723  | -0.978101 |
| H | -8.261015  | 4.660265  | -1.171327 |
| H | -4.727472  | -2.447117 | 0.188538  |
| H | -6.007633  | -4.544020 | 0.355729  |
| O | -8.072089  | -5.960450 | 0.370954  |
| O | -11.989832 | -3.697445 | -0.279391 |
| O | -6.259295  | 6.076742  | -1.170214 |
| O | -2.305045  | 3.843914  | -0.855642 |
| C | -2.153531  | 1.250337  | 0.199092  |
| C | -1.257074  | 0.416581  | -0.424138 |
| C | 0.025614   | 0.477246  | 0.184747  |
| C | 0.088530   | 1.322723  | 1.282341  |
| C | 1.371682   | 1.386846  | 1.916174  |
| C | 2.295542   | 0.570889  | 1.268718  |
| S | -1.443640  | 2.086807  | 1.581996  |
| S | 1.569594   | -0.278384 | -0.098863 |
| H | -1.510512  | -0.180398 | -1.292413 |
| C | 3.712413   | 0.353358  | 1.579686  |
| C | 4.155294   | 0.323301  | 2.923106  |
| C | 4.646013   | 0.155240  | 0.552628  |
| C | 5.490998   | 0.109087  | 3.236834  |
| C | 5.993412   | -0.069519 | 0.848271  |
| C | 6.404291   | -0.088418 | 2.199169  |
| C | 7.097646   | -0.290833 | -0.070713 |
| C | 8.316087   | -0.477416 | 0.605020  |
| C | 9.520983   | -0.713867 | -0.082327 |
| C | 9.503063   | -0.758899 | -1.487529 |
| C | 7.084172   | -0.336830 | -1.470874 |



|   |            |           |           |
|---|------------|-----------|-----------|
| C | 8.274850   | -0.565970 | -2.145576 |
| C | 10.782571  | -1.005775 | -2.305065 |
| C | 12.009926  | -1.204013 | -1.400399 |
| C | 11.922899  | -1.143392 | 0.002480  |
| N | 10.701432  | -0.894849 | 0.616378  |
| C | 13.063610  | -1.329863 | 0.800462  |
| C | 14.299553  | -1.575757 | 0.215792  |
| C | 14.409217  | -1.637457 | -1.174774 |
| C | 13.270664  | -1.451692 | -1.957258 |
| H | 3.435840   | 0.459887  | 3.721719  |
| H | 5.811990   | 0.085922  | 4.273891  |
| H | 4.327692   | 0.199451  | -0.484838 |
| H | 6.158167   | -0.194252 | -2.019299 |
| H | 8.255719   | -0.597269 | -3.230402 |
| H | 10.678713  | -0.884013 | 1.624914  |
| H | 13.367168  | -1.501084 | -3.038153 |
| H | 15.368913  | -1.827635 | -1.645931 |
| H | 15.173469  | -1.718023 | 0.845535  |
| H | 12.968522  | -1.278703 | 1.883343  |
| C | 11.031806  | 0.216783  | -3.227294 |
| C | 10.587640  | -2.277370 | -3.172514 |
| H | 11.171661  | 1.124459  | -2.631672 |
| H | 11.927125  | 0.069219  | -3.840262 |
| H | 10.186908  | 0.379621  | -3.904657 |
| H | 9.732383   | -2.169156 | -3.847694 |
| H | 11.472424  | -2.472996 | -3.787171 |
| H | 10.413097  | -3.151813 | -2.537635 |
| S | 8.136377   | -0.378234 | 2.368274  |
| C | -3.501925  | 6.193674  | -1.137083 |
| H | -2.769977  | 6.310465  | -0.335669 |
| H | -2.963724  | 6.129322  | -2.086444 |
| H | -4.199645  | 7.027719  | -1.151983 |
| C | -10.733894 | -6.119123 | 0.157398  |
| H | -10.371669 | -6.804490 | -0.612483 |
| H | -10.534562 | -6.565100 | 1.134733  |
| H | -11.797143 | -5.928166 | 0.032447  |
| H | -3.773719  | -0.726557 | 0.260303  |
| C | 1.634759   | 2.231976  | 3.026265  |
| C | 1.799000   | 2.967458  | 3.973201  |
| H | 1.962428   | 3.623233  | 4.798060  |

### 23. Compound PDI-BTAC-3

|   |            |           |           |
|---|------------|-----------|-----------|
| C | -9.367453  | -1.235109 | 0.960753  |
| C | -8.117257  | -1.579234 | 0.392109  |
| C | -7.895274  | -2.902063 | -0.059592 |
| C | -8.954941  | -3.931163 | 0.057262  |
| C | -10.451327 | -2.239083 | 1.098763  |
| N | -10.167339 | -3.533409 | 0.634867  |
| C | -6.678428  | -3.240680 | -0.625152 |
| C | -5.662034  | -2.286499 | -0.740719 |
| C | -5.828656  | -0.974458 | -0.293530 |
| C | -7.086619  | -0.596999 | 0.271746  |
| C | -7.340377  | 0.740121  | 0.713222  |
| C | -9.586859  | 0.060079  | 1.396301  |
| C | -8.586992  | 1.030820  | 1.270878  |
| C | -4.761500  | 0.032263  | -0.389565 |
| C | -5.026963  | 1.380372  | 0.007702  |
| C | -6.290763  | 1.758742  | 0.556682  |
| C | -3.994194  | 2.358284  | -0.148986 |
| C | -4.248216  | 3.697101  | 0.245528  |
| C | -6.485691  | 3.089957  | 0.930270  |
| C | -5.478103  | 4.043985  | 0.779971  |
| C | -2.443363  | 0.658568  | -0.954182 |
| C | -2.721259  | 2.007715  | -0.681311 |
| C | -3.482028  | -0.290072 | -0.815713 |
| C | -1.775017  | 3.095063  | -1.048764 |
| C | -3.220621  | 4.754399  | 0.106677  |
| N | -2.037077  | 4.374928  | -0.532050 |
| H | -6.531695  | -4.257095 | -0.974935 |
| H | -4.729497  | -2.592239 | -1.200205 |
| H | -3.223069  | -1.322261 | -1.016107 |
| H | -5.637468  | 5.074289  | 1.079349  |
| H | -7.432405  | 3.411525  | 1.347029  |
| H | -8.808561  | 2.031054  | 1.622961  |
| H | -10.549145 | 0.306633  | 1.832194  |
| O | -11.537424 | -1.961300 | 1.589861  |
| O | -8.803467  | -5.084355 | -0.324850 |
| O | -0.808297  | 2.940869  | -1.781988 |
| O | -3.400040  | 5.900052  | 0.501601  |
| C | -1.138566  | 0.129485  | -1.325657 |
| C | -0.772403  | -0.900325 | -2.161890 |

|   |           |           |           |
|---|-----------|-----------|-----------|
| C | 0.644191  | -0.987618 | -2.107309 |
| C | 1.062910  | -0.017130 | -1.225462 |
| H | -1.440230 | -1.487162 | -2.777225 |
| H | 1.280235  | -1.652037 | -2.674357 |
| C | 2.369340  | 0.426438  | -0.765594 |
| C | 3.486429  | -0.408110 | -0.889502 |
| C | 4.744342  | 0.032443  | -0.469920 |
| C | 2.518735  | 1.716757  | -0.207765 |
| C | 4.864921  | 1.323987  | 0.091377  |
| C | 3.758972  | 2.167183  | 0.223551  |
| C | 6.015208  | -0.673058 | -0.515511 |
| C | 7.067136  | 0.103091  | 0.007541  |
| C | 8.379229  | -0.387171 | 0.073243  |
| C | 8.656986  | -1.674842 | -0.422981 |
| C | 6.290249  | -1.966002 | -0.976233 |
| C | 7.595004  | -2.443615 | -0.925988 |
| N | 9.412655  | 0.371693  | 0.625771  |
| C | 10.513562 | -0.277267 | 1.202805  |
| C | 10.865061 | -1.560295 | 0.739053  |
| C | 10.127585 | -2.112785 | -0.488726 |
| C | 11.237053 | 0.342164  | 2.228751  |
| C | 12.312019 | -0.316324 | 2.818842  |
| C | 12.656387 | -1.600469 | 2.396570  |
| C | 11.933833 | -2.206821 | 1.366794  |
| H | 3.374127  | -1.407263 | -1.300384 |
| H | 1.650032  | 2.363311  | -0.144968 |
| H | 3.865058  | 3.161668  | 0.646413  |
| H | 5.494551  | -2.588495 | -1.374339 |
| H | 7.792054  | -3.442295 | -1.297960 |
| H | 10.944572 | 1.333583  | 2.568813  |
| H | 12.868408 | 0.169593  | 3.615609  |
| H | 13.486751 | -2.127011 | 2.857894  |
| H | 12.223766 | -3.200972 | 1.044485  |
| H | 9.139902  | 1.234095  | 1.079196  |
| C | 10.271711 | -3.638402 | -0.609991 |
| C | 10.757391 | -1.457810 | -1.752600 |
| H | 9.837475  | -4.154811 | 0.252526  |
| H | 11.324928 | -3.921654 | -0.690848 |
| H | 9.784014  | -4.004493 | -1.517962 |
| H | 11.818083 | -1.724146 | -1.827118 |
| H | 10.240869 | -1.803167 | -2.655732 |
| H | 10.680033 | -0.367267 | -1.708925 |

|   |            |           |           |
|---|------------|-----------|-----------|
| S | 6.524114   | 1.698001  | 0.564030  |
| C | -1.034365  | 5.403981  | -0.826863 |
| H | -0.050654  | 5.051387  | -0.510059 |
| H | -0.998812  | 5.595374  | -1.902617 |
| H | -1.314137  | 6.307038  | -0.289214 |
| C | -11.200559 | -4.569373 | 0.744505  |
| H | -11.455638 | -4.940751 | -0.251012 |
| H | -10.818357 | -5.405666 | 1.334422  |
| H | -12.070950 | -4.126567 | 1.222970  |
| O | -0.023057  | 0.647730  | -0.737479 |

#### 24. Compound PDI-BTAC-4

|   |           |           |           |
|---|-----------|-----------|-----------|
| C | 6.060875  | -3.561801 | 0.000869  |
| C | 6.839451  | -2.381483 | -0.057605 |
| C | 8.250661  | -2.478073 | -0.120694 |
| C | 8.931567  | -3.796592 | -0.128373 |
| C | 6.704661  | -4.896577 | -0.001894 |
| N | 8.103259  | -4.928439 | -0.068715 |
| C | 9.012918  | -1.324527 | -0.176535 |
| C | 8.399297  | -0.067084 | -0.169643 |
| C | 7.012213  | 0.078513  | -0.107762 |
| C | 6.204510  | -1.101160 | -0.052802 |
| C | 4.777505  | -1.032168 | 0.007216  |
| C | 4.681448  | -3.472968 | 0.062790  |
| C | 4.052140  | -2.223628 | 0.065266  |
| C | 6.359384  | 1.396749  | -0.096926 |
| C | 4.934007  | 1.470688  | -0.043139 |
| C | 4.126936  | 0.288108  | 0.005073  |
| C | 4.287775  | 2.748229  | -0.037621 |
| C | 2.871897  | 2.855958  | 0.010344  |
| C | 2.749443  | 0.426575  | 0.047780  |
| C | 2.095709  | 1.684712  | 0.050709  |
| C | 6.460523  | 3.830916  | -0.130532 |
| C | 5.079246  | 3.924287  | -0.081932 |
| C | 7.090692  | 2.586208  | -0.138084 |
| C | 4.467465  | 5.272832  | -0.078254 |
| C | 2.228280  | 4.191749  | 0.015978  |
| N | 3.071097  | 5.313608  | -0.028019 |
| H | 10.092799 | -1.415606 | -0.224936 |

|   |            |           |           |
|---|------------|-----------|-----------|
| H | 9.039405   | 0.805590  | -0.214829 |
| H | 8.172924   | 2.565156  | -0.176439 |
| H | 7.038313   | 4.748284  | -0.162997 |
| H | 2.106793   | -0.443775 | 0.080124  |
| H | 2.970135   | -2.203475 | 0.114882  |
| H | 4.102067   | -4.389028 | 0.108625  |
| O | 6.066342   | -5.939879 | 0.050331  |
| O | 10.149837  | -3.899607 | -0.183776 |
| O | 5.139589   | 6.296430  | -0.116533 |
| O | 1.016332   | 4.363426  | 0.056957  |
| C | 0.681942   | 1.676802  | 0.093163  |
| C | -0.530459  | 1.583117  | 0.126812  |
| C | -1.942807  | 1.719604  | 0.161000  |
| C | -2.486681  | 3.030136  | 0.165216  |
| C | -3.859031  | 3.225798  | 0.195146  |
| C | -4.696867  | 2.105946  | 0.219065  |
| C | -2.795628  | 0.606549  | 0.187836  |
| C | -4.180433  | 0.789072  | 0.217245  |
| C | -5.229003  | -0.218361 | 0.245618  |
| C | -6.512680  | 0.359357  | 0.269031  |
| C | -7.673154  | -0.427508 | 0.279777  |
| C | -5.112701  | -1.613155 | 0.230675  |
| C | -7.550390  | -1.829986 | 0.299032  |
| C | -6.264212  | -2.391848 | 0.259855  |
| C | -8.832026  | -2.656708 | 0.479811  |
| C | -9.975676  | -1.971140 | -0.280220 |
| C | -10.019352 | -0.563261 | -0.286533 |
| C | -11.106113 | 0.122577  | -0.841679 |
| C | -12.158944 | -0.586299 | -1.412949 |
| C | -12.120492 | -1.980348 | -1.445464 |
| C | -11.035530 | -2.655460 | -0.882287 |
| N | -8.944372  | 0.148820  | 0.265302  |
| H | -1.801881  | 3.872027  | 0.143424  |
| H | -4.272110  | 4.229926  | 0.197884  |
| H | -2.373332  | -0.393448 | 0.184900  |
| H | -8.980108  | 1.150485  | 0.127076  |
| H | -4.134156  | -2.082802 | 0.202079  |
| H | -6.155861  | -3.470169 | 0.260958  |
| H | -11.028706 | -3.739594 | -0.906427 |
| H | -12.931826 | -2.542591 | -1.898382 |
| H | -12.998895 | -0.047777 | -1.842982 |
| H | -11.114434 | 1.210715  | -0.834551 |

|   |            |           |           |
|---|------------|-----------|-----------|
| C | -9.192648  | -2.638813 | 1.993971  |
| C | -8.643155  | -4.118614 | 0.043028  |
| H | -8.386400  | -3.094238 | 2.580746  |
| H | -9.557716  | -4.693900 | 0.212470  |
| H | -8.376824  | -4.192128 | -1.016590 |
| H | -9.339741  | -1.614655 | 2.349954  |
| H | -10.118272 | -3.199337 | 2.168631  |
| H | -7.861023  | -4.603410 | 0.634247  |
| S | -6.459344  | 2.132990  | 0.259024  |
| C | 2.400988   | 6.618571  | -0.020691 |
| H | 1.736657   | 6.695241  | -0.884708 |
| H | 1.797667   | 6.716361  | 0.884915  |
| H | 3.168291   | 7.388326  | -0.056409 |
| C | 8.719207   | -6.260116 | -0.072680 |
| H | 8.447454   | -6.792923 | 0.841762  |
| H | 8.347831   | -6.832679 | -0.925832 |
| H | 9.797213   | -6.131586 | -0.135816 |

## 25. Compound PDI-BTAC-5

|   |            |           |          |
|---|------------|-----------|----------|
| C | -10.524395 | 3.632518  | 0.497167 |
| C | -11.242465 | 2.414695  | 0.421391 |
| C | -12.657544 | 2.437955  | 0.398853 |
| C | -13.395988 | 3.721807  | 0.447527 |
| C | -11.229164 | 4.937937  | 0.552643 |
| N | -12.631549 | 4.893276  | 0.520287 |
| C | -13.362882 | 1.249642  | 0.329958 |
| C | -12.686226 | 0.025642  | 0.288274 |
| C | -11.292000 | -0.048756 | 0.310372 |
| C | -10.543934 | 1.169468  | 0.369200 |
| C | -9.114186  | 1.172819  | 0.379853 |
| C | -9.140717  | 3.611478  | 0.525202 |
| C | -8.448714  | 2.396954  | 0.467912 |
| C | -10.572173 | -1.330905 | 0.280655 |
| C | -9.141788  | -1.329336 | 0.271050 |
| C | -8.399112  | -0.109036 | 0.298421 |
| C | -8.427874  | -2.568601 | 0.233946 |
| C | -7.005166  | -2.596273 | 0.204511 |
| C | -7.014108  | -0.176644 | 0.213923 |
| C | -6.295790  | -1.389558 | 0.149304 |

|   |            |           |           |
|---|------------|-----------|-----------|
| C | -10.540575 | -3.766661 | 0.226117  |
| C | -9.156290  | -3.785667 | 0.216272  |
| C | -11.237819 | -2.557116 | 0.258577  |
| C | -8.472773  | -5.099868 | 0.187329  |
| C | -6.301265  | -3.900489 | 0.340791  |
| N | -7.076940  | -5.065882 | 0.249249  |
| H | -14.446952 | 1.287756  | 0.311408  |
| H | -13.281348 | -0.878067 | 0.236383  |
| H | -12.320301 | -2.595304 | 0.268787  |
| H | -11.069334 | -4.713546 | 0.206940  |
| H | -7.366161  | 2.429718  | 0.497890  |
| H | -8.606601  | 4.553331  | 0.590984  |
| O | -10.625408 | 6.000079  | 0.622038  |
| O | -14.618269 | 3.783986  | 0.426346  |
| O | -9.088610  | -6.156779 | 0.131200  |
| O | -5.099047  | -4.001572 | 0.539180  |
| C | -4.836642  | -1.264569 | -0.025189 |
| C | -3.981439  | -0.560619 | 0.789214  |
| C | -2.660025  | -0.537291 | 0.272592  |
| C | -2.514572  | -1.191675 | -0.949200 |
| C | -1.197306  | -1.166578 | -1.472206 |
| C | -0.324789  | -0.490456 | -0.643907 |
| S | -4.030867  | -1.869501 | -1.474541 |
| S | -1.142178  | 0.142661  | 0.798501  |
| H | -4.295706  | -0.112105 | 1.724410  |
| H | -0.886170  | -1.645331 | -2.393317 |
| C | 1.089797   | -0.264168 | -0.830434 |
| C | 2.043852   | 0.014742  | 0.127131  |
| C | 3.333577   | 0.171316  | -0.438213 |
| C | 3.379301   | 0.012781  | -1.821877 |
| C | 4.675185   | 0.141938  | -2.382963 |
| C | 5.631898   | 0.403759  | -1.426687 |
| S | 1.790557   | -0.321671 | -2.460243 |
| S | 4.923847   | 0.502151  | 0.195654  |
| H | 1.818841   | 0.073698  | 1.185689  |
| H | 4.909535   | 0.016410  | -3.433200 |
| C | 7.069682   | 0.601695  | -1.631328 |
| C | 7.534194   | 1.159206  | -2.845922 |
| C | 8.004289   | 0.243491  | -0.650888 |
| C | 8.889230   | 1.343788  | -3.086797 |
| C | 9.372757   | 0.430839  | -0.868437 |
| C | 9.803443   | 0.981352  | -2.095426 |

|   |            |           |           |
|---|------------|-----------|-----------|
| C | 10.482033  | 0.117533  | 0.017942  |
| C | 11.724745  | 0.441872  | -0.559511 |
| C | 12.929567  | 0.238340  | 0.128195  |
| C | 12.897737  | -0.334847 | 1.413514  |
| C | 10.453296  | -0.418408 | 1.310910  |
| C | 11.650303  | -0.637376 | 1.983193  |
| C | 14.239197  | -0.701581 | 2.064707  |
| C | 15.276142  | 0.370151  | 1.701085  |
| C | 15.229445  | 0.928102  | 0.408313  |
| N | 14.157168  | 0.596805  | -0.432438 |
| C | 16.224904  | 1.807426  | -0.034008 |
| C | 17.273386  | 2.155878  | 0.812595  |
| C | 17.321014  | 1.639713  | 2.107663  |
| C | 16.327498  | 0.757292  | 2.537123  |
| H | 6.813880   | 1.472518  | -3.595015 |
| H | 9.225604   | 1.776677  | -4.024127 |
| H | 7.668656   | -0.207875 | 0.278451  |
| H | 9.507062   | -0.666307 | 1.782223  |
| H | 11.610747  | -1.064541 | 2.978413  |
| H | 14.116347  | 1.120197  | -1.297431 |
| H | 16.387213  | 0.357812  | 3.543580  |
| H | 18.128932  | 1.913639  | 2.779810  |
| H | 18.041892  | 2.839831  | 0.463133  |
| H | 16.165009  | 2.225214  | -1.037015 |
| C | 14.712122  | -2.047300 | 1.441514  |
| C | 14.112117  | -0.889244 | 3.585243  |
| H | 14.821117  | -1.960122 | 0.356279  |
| H | 15.681948  | -2.337481 | 1.862006  |
| H | 13.983440  | -2.838900 | 1.651436  |
| H | 13.408369  | -1.692629 | 3.820935  |
| H | 15.071663  | -1.183669 | 4.019503  |
| H | 13.773418  | 0.027988  | 4.078323  |
| S | 11.560213  | 1.128588  | -2.187462 |
| C | -6.340580  | -6.333518 | 0.320406  |
| H | -5.553263  | -6.336928 | -0.435894 |
| H | -5.872585  | -6.437327 | 1.302793  |
| H | -7.048053  | -7.141400 | 0.148873  |
| C | -13.383385 | 6.152553  | 0.567839  |
| H | -12.667696 | 6.969803  | 0.617421  |
| H | -14.007846 | 6.239752  | -0.324376 |
| H | -14.035590 | 6.157316  | 1.444424  |
| H | -6.425473  | 0.730276  | 0.157322  |



Table S2: Energies of HOMO, LUMO,  $\Delta_{H-L}$ , and  $\lambda_{\max}$  values of the reference compound PDI-DTT (bay-substituted).

| Functional   | HOMO (eV) | LUMO (eV) | $\Delta_{H-L}$ (eV) | $\lambda_{\max}$ (nm) |
|--------------|-----------|-----------|---------------------|-----------------------|
| Experimental | -5.70     | -3.80     | 1.90                | 490                   |
| B3LYP        | -5.62     | -3.43     | 2.19                | 669                   |
| B3LYP-D3     | -5.58     | -3.44     | 2.14                | 681                   |
| B3PW91       | -5.74     | -3.55     | 2.19                | 668                   |
| CAM-B3LYP    | -6.90     | -2.42     | 4.48                | 443                   |
| HSEH1PBE     | -5.51     | -3.73     | 1.78                | 675                   |
| PBEPBE       | -5.00     | -3.91     | 1.09                | 923                   |
| WB97XD       | -7.40     | -1.93     | 5.47                | 440                   |

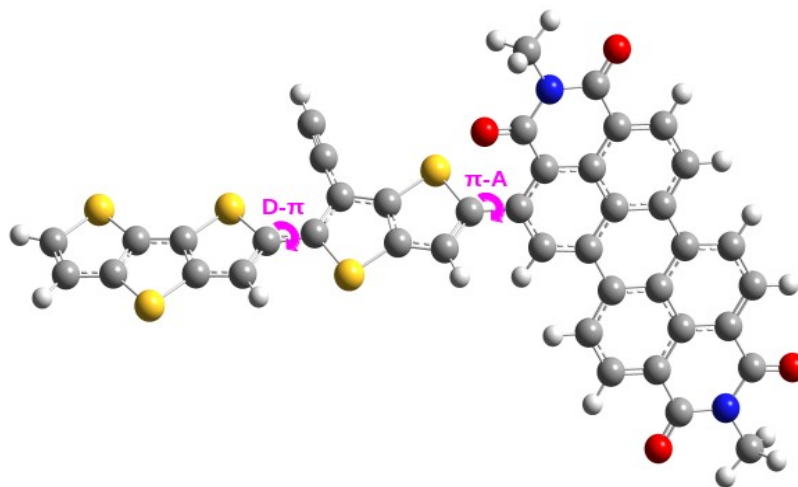

Fig. S1 : Representation of dihedral angles in a monomer.

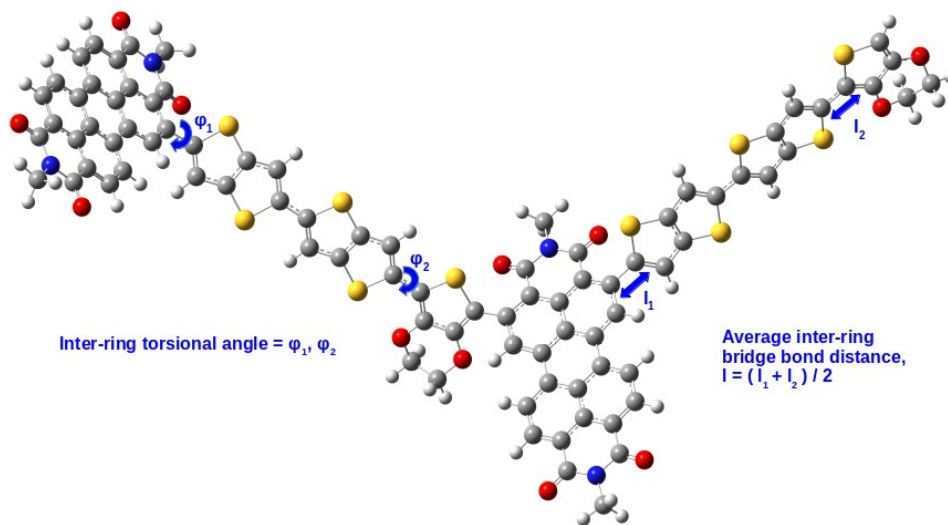

Fig. S2 : Representation of dihedral angle, inter-ring torsional angle, inter-ring bridge bond distance.

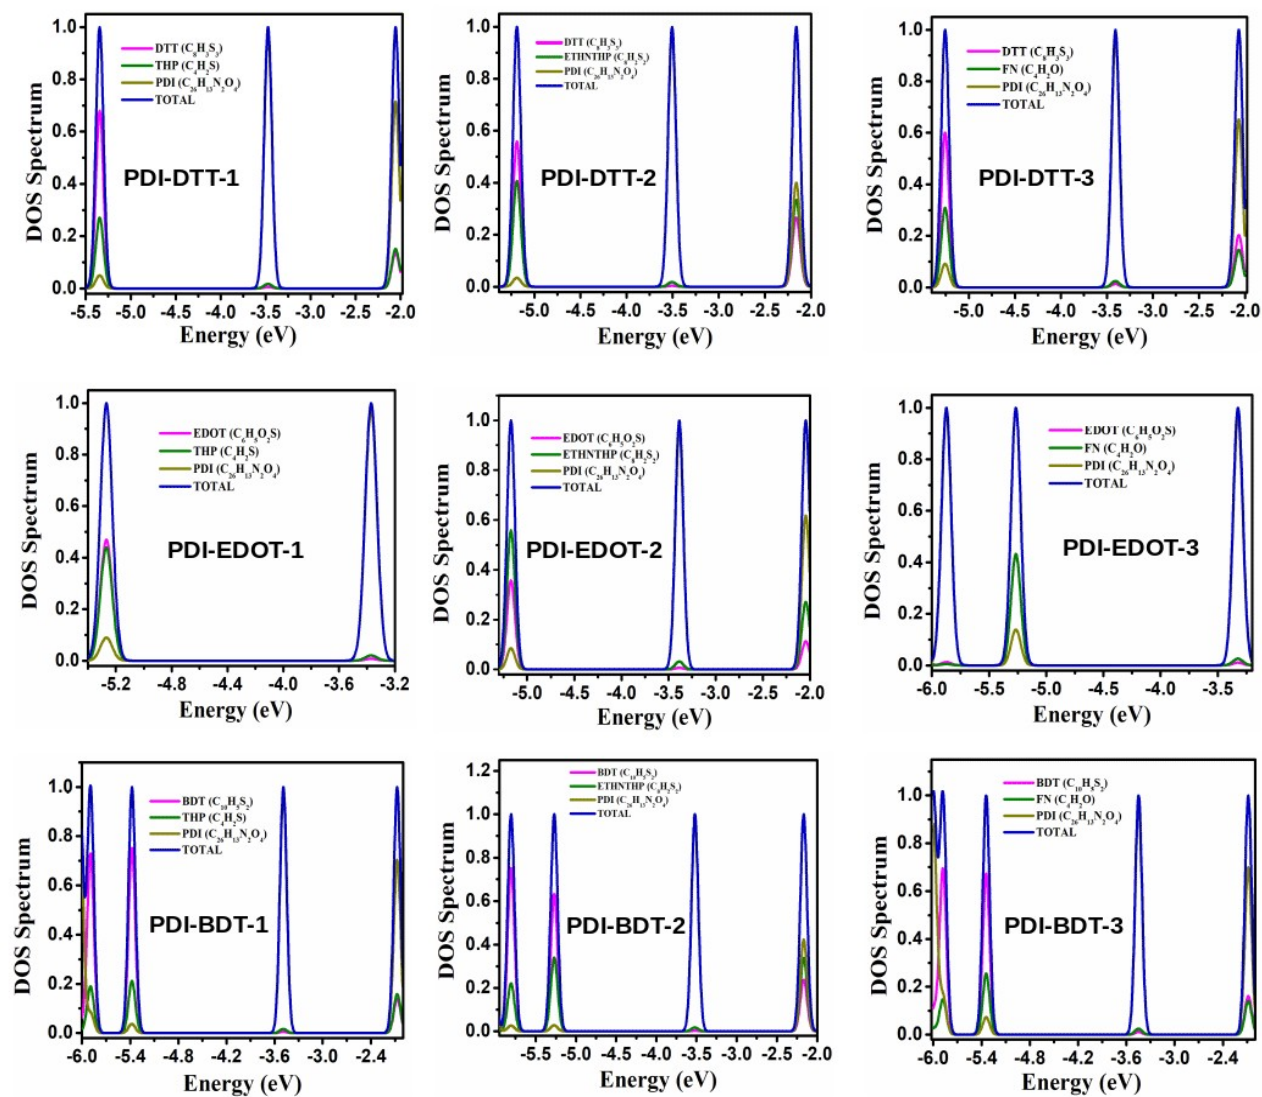

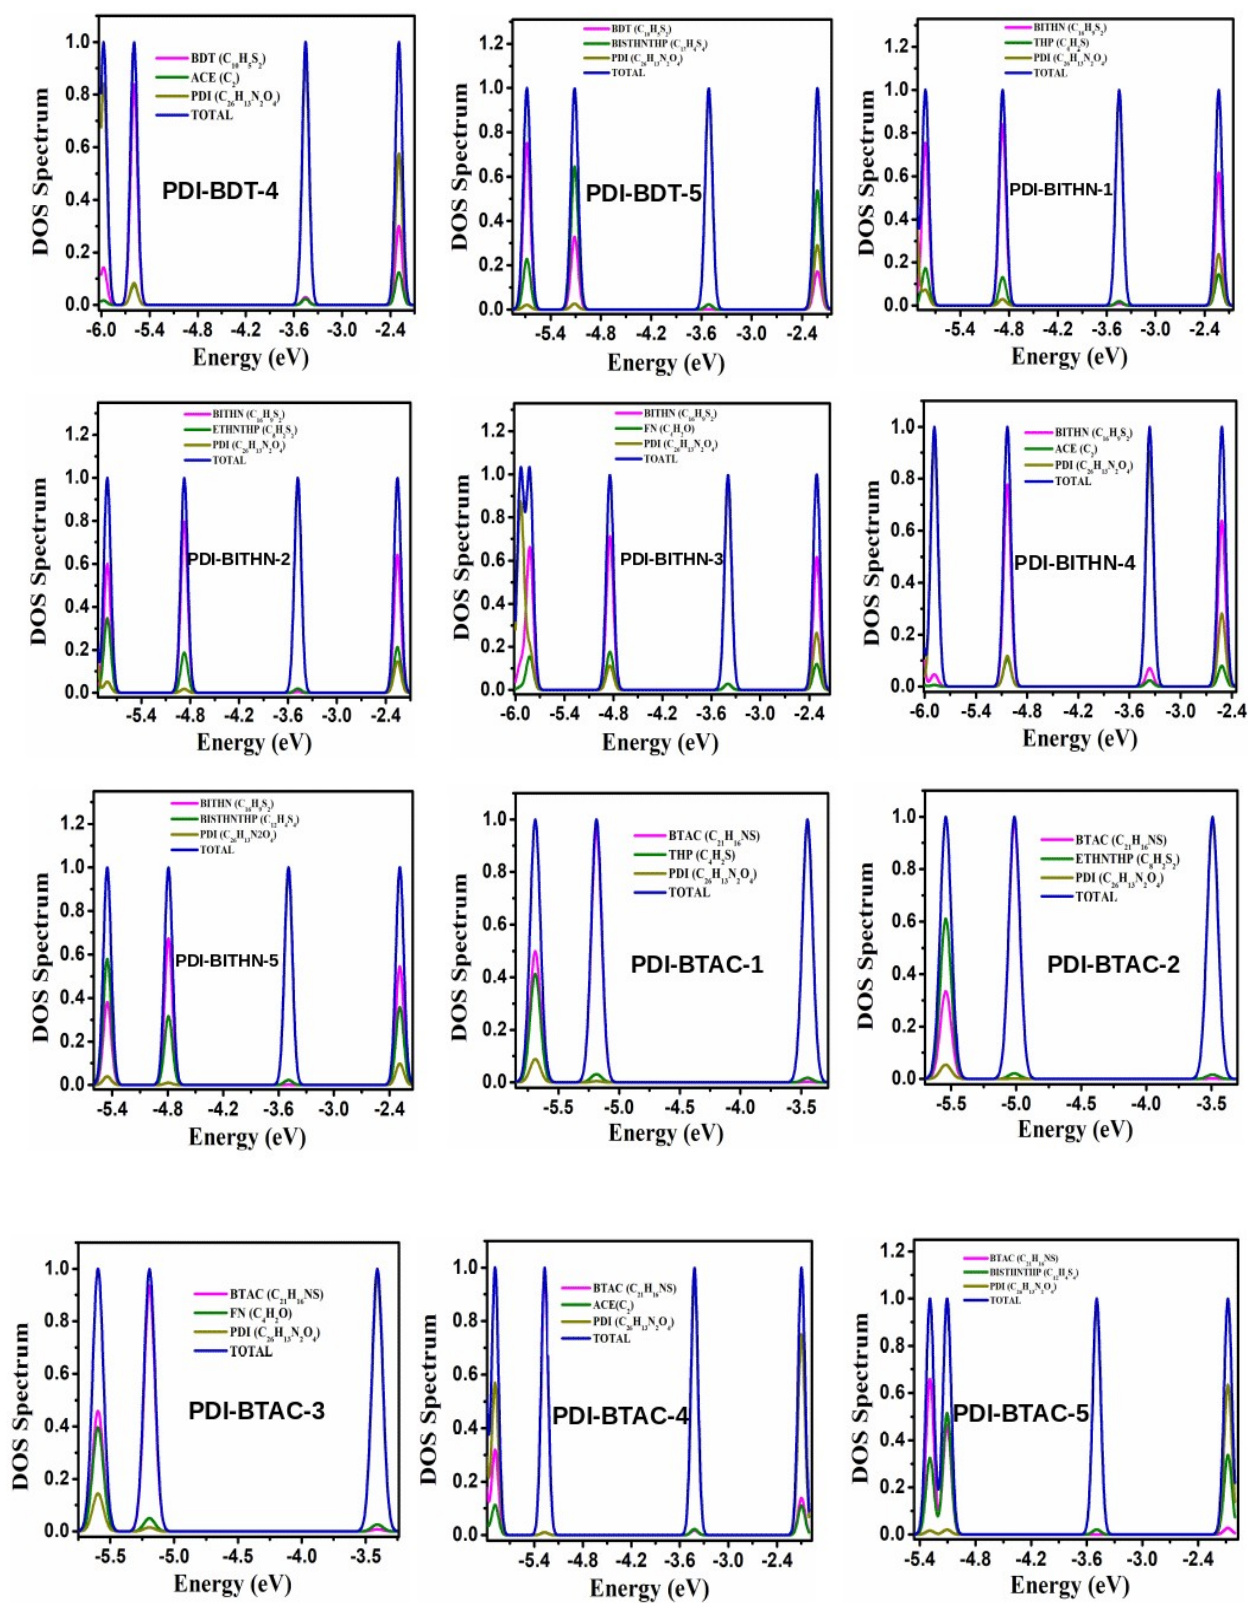

Fig. S3 : PDOS spectra of the studied compounds.

Table S3: Spectral data of designed compounds obtained from PDOS spectra.

| <b>Compounds</b> | <b>Groups</b> | <b>Contribution to HOMO (%)</b> | <b>Contribution to LUMO (%)</b> |
|------------------|---------------|---------------------------------|---------------------------------|
| PDI-DTT-1        | Donor         | 68                              | 1                               |
|                  | Bridging unit | 27                              | 2                               |
|                  | Acceptor      | 5                               | 97                              |
| PDI-DTT-2        | Donor         | 56                              | 0                               |
|                  | Bridging unit | 41                              | 2                               |
|                  | Acceptor      | 3                               | 98                              |
| PDI-DTT-3        | Donor         | 60                              | 1                               |
|                  | Bridging unit | 31                              | 2                               |
|                  | Acceptor      | 9                               | 97                              |
| PDI-DTT-4        | Donor         | 67                              | 3                               |
|                  | Bridging unit | 15                              | 2                               |
|                  | Acceptor      | 18                              | 44                              |
| PDI-DTT-5        | Donor         | 35                              | 0                               |
|                  | Bridging unit | 63                              | 2                               |
|                  | Acceptor      | 2                               | 98                              |
| PDI-EDOT-1       | Donor         | 47                              | 1                               |
|                  | Bridging unit | 44                              | 2                               |
|                  | Acceptor      | 9                               | 97                              |
| PDI-EDOT-2       | Donor         | 36                              | 1                               |
|                  | Bridging unit | 56                              | 2                               |
|                  | Acceptor      | 8                               | 97                              |
| PDI-EDOT-3       | Donor         | 43                              | 1                               |
|                  | Bridging unit | 43                              | 3                               |
|                  | Acceptor      | 14                              | 96                              |
| PDI-EDOT-4       | Donor         | 45                              | 2                               |
|                  | Bridging unit | 21                              | 3                               |
|                  | Acceptor      | 34                              | 95                              |
| PDI-EDOT-5       | Donor         | 24                              | 0                               |
|                  | Bridging unit | 73                              | 3                               |
|                  | Acceptor      | 3                               | 97                              |
| PDI-BDT-1        | Donor         | 75                              | 1                               |
|                  | Bridging unit | 21                              | 2                               |

|             |                                    |                |              |
|-------------|------------------------------------|----------------|--------------|
|             | Acceptor                           | 4              | 97           |
| PDI-BDT-2   | Donor<br>Bridging unit<br>Acceptor | 63<br>34<br>3  | 0<br>2<br>98 |
| PDI-BDT-3   | Donor<br>Bridging unit<br>Acceptor | 67<br>26<br>7  | 1<br>3<br>96 |
| PDI-BDT-4   | Donor<br>Bridging unit<br>Acceptor | 84<br>8<br>8   | 3<br>2<br>95 |
| PDI-BDT-5   | Donor<br>Bridging unit<br>Acceptor | 33<br>64<br>3  | 0<br>2<br>98 |
| PDI-BITHN-1 | Donor<br>Bridging unit<br>Acceptor | 84<br>13<br>3  | 1<br>2<br>97 |
| PDI-BITHN-2 | Donor<br>Bridging unit<br>Acceptor | 80<br>18<br>2  | 0<br>98<br>2 |
| PDI-BITHN-3 | Donor<br>Bridging unit<br>Acceptor | 71<br>18<br>11 | 3<br>3<br>94 |
| PDI-BITHN-4 | Donor<br>Bridging unit<br>Acceptor | 78<br>10<br>12 | 7<br>2<br>91 |
| PDI-BITHN-5 | Donor<br>Bridging unit<br>Acceptor | 67<br>32<br>1  | 0<br>2<br>98 |
| PDI-BTAC-1  | Donor<br>Bridging unit<br>Acceptor | 97<br>3<br>0   | 0<br>2<br>98 |
| PDI-BTAC-2  | Donor<br>Bridging unit<br>Acceptor | 98<br>2<br>0   | 0<br>2<br>98 |
| PDI-BTAC-3  | Donor<br>Bridging unit<br>Acceptor | 93<br>5<br>2   | 1<br>3<br>96 |

|            |               |    |    |
|------------|---------------|----|----|
| PDI-BTAC-4 | Donor         | 98 | 2  |
|            | Bridging unit | 1  | 2  |
|            | Acceptor      | 1  | 96 |
| PDI-BTAC-5 | Donor         | 46 | 0  |
|            | Bridging unit | 52 | 2  |
|            | Acceptor      | 2  | 98 |

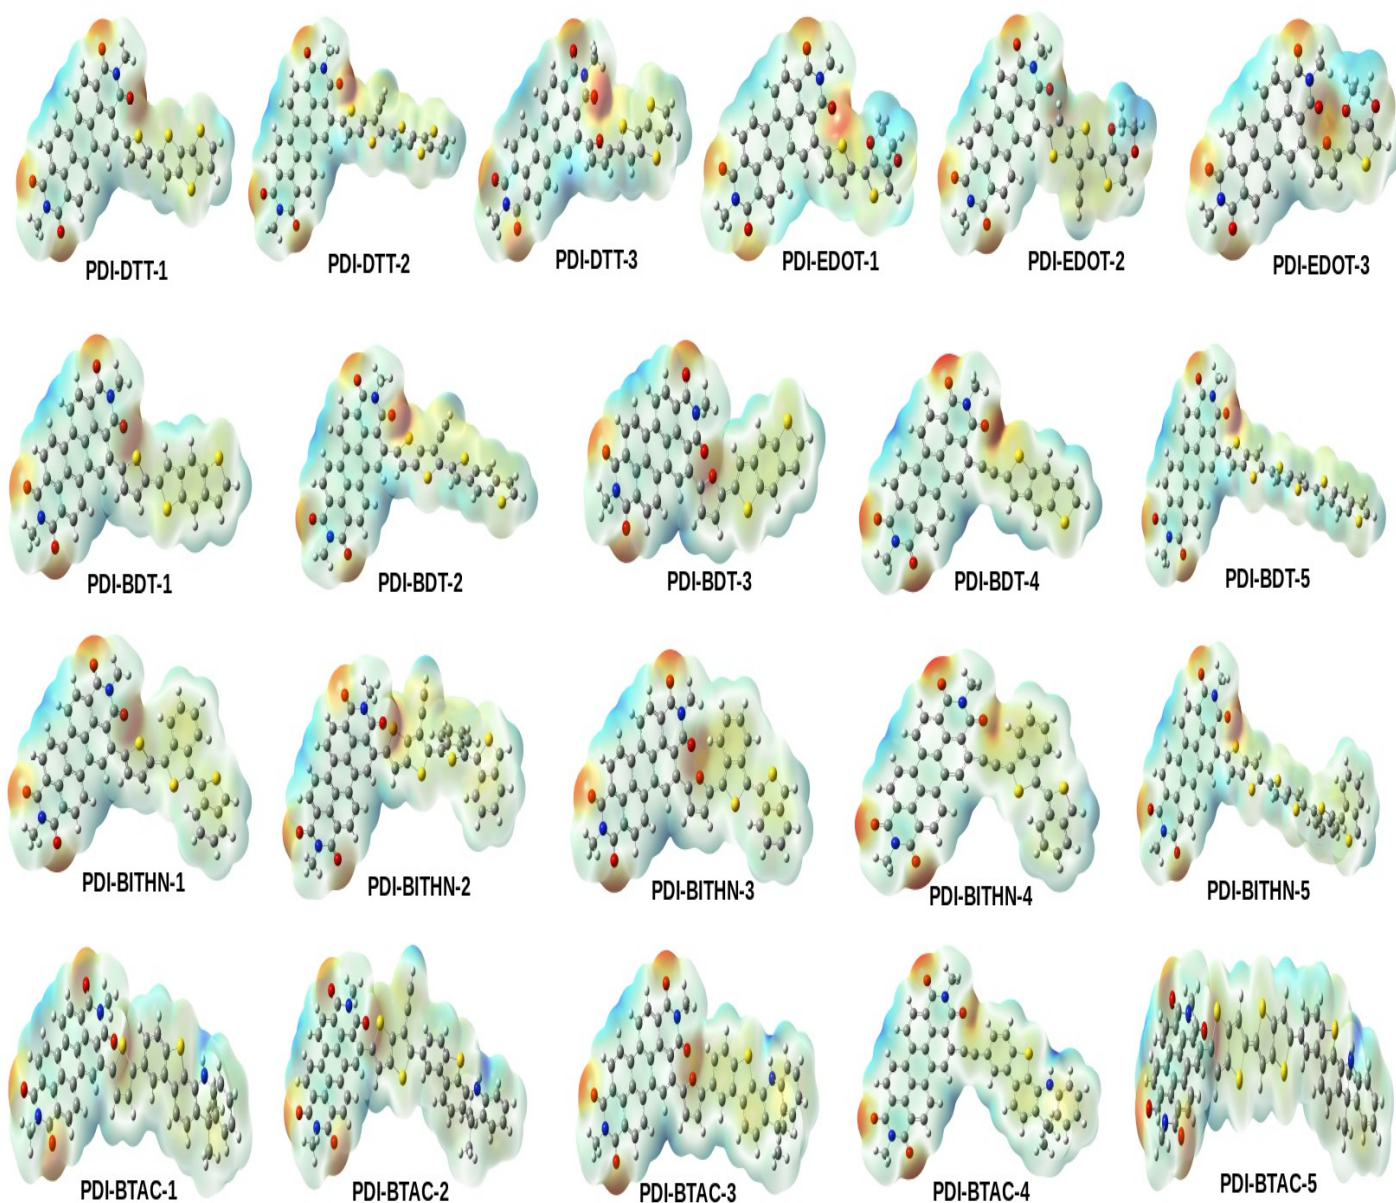

Fig. S4 : MEPS contour plot of the studied compounds.

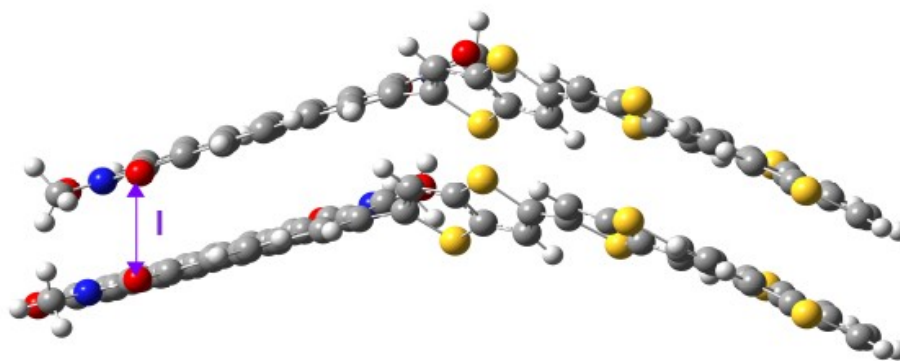

Fig. S5 : Representative structure of two stacked monomers along with distance  $l$ .

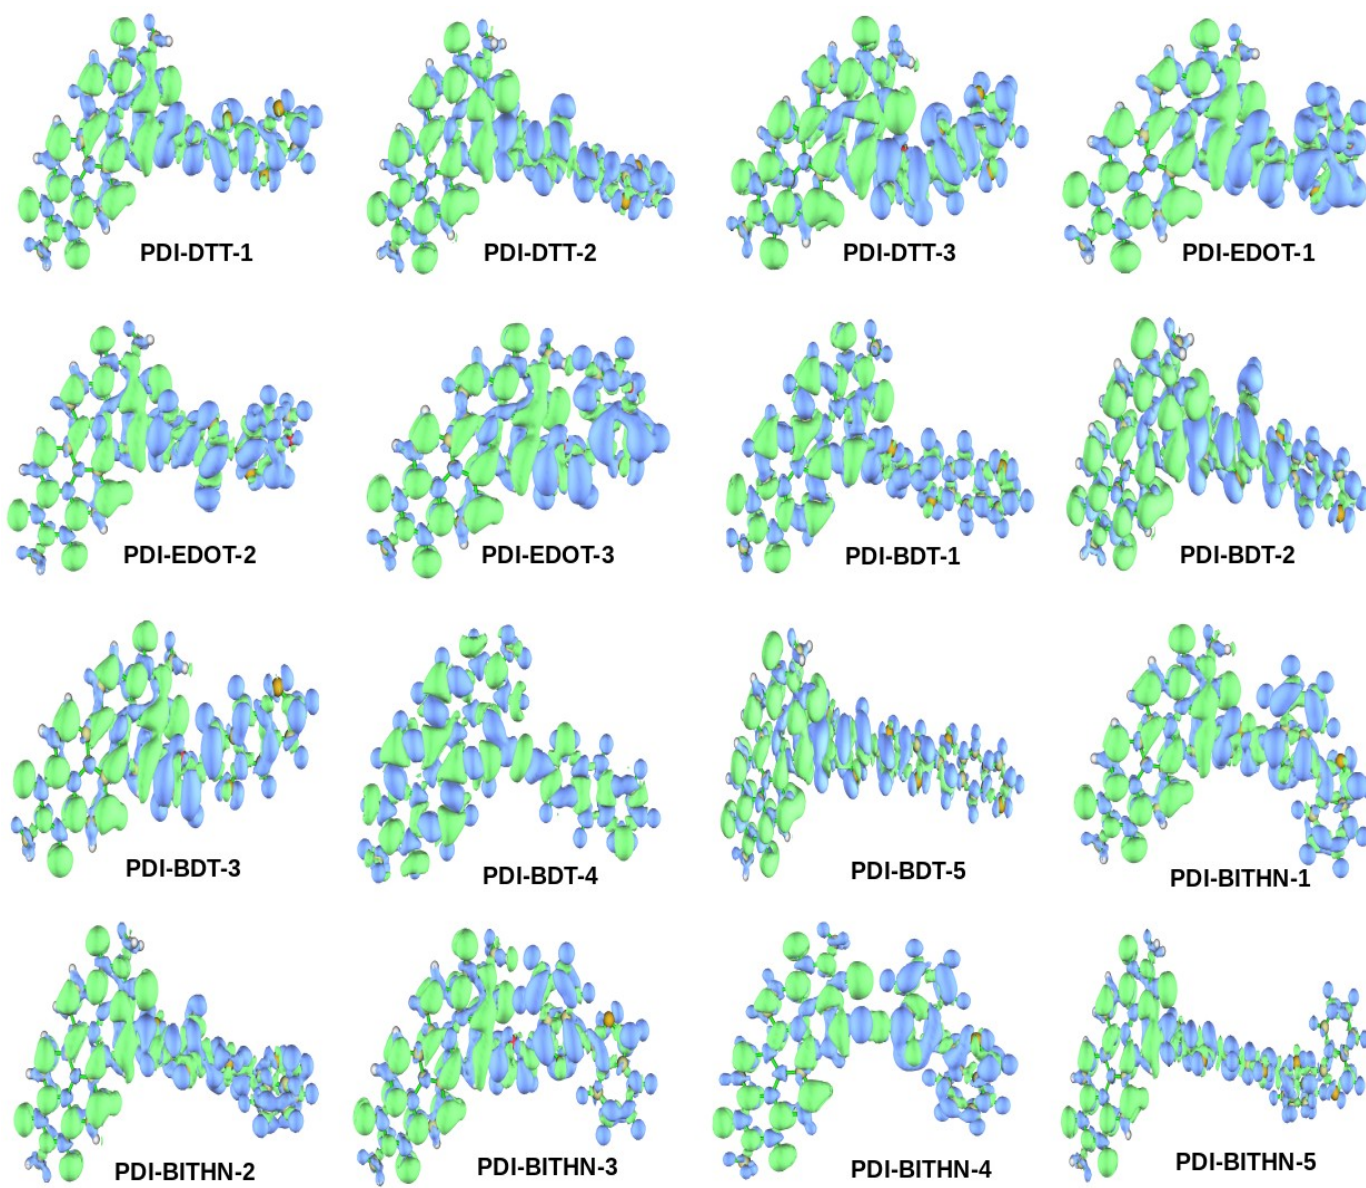

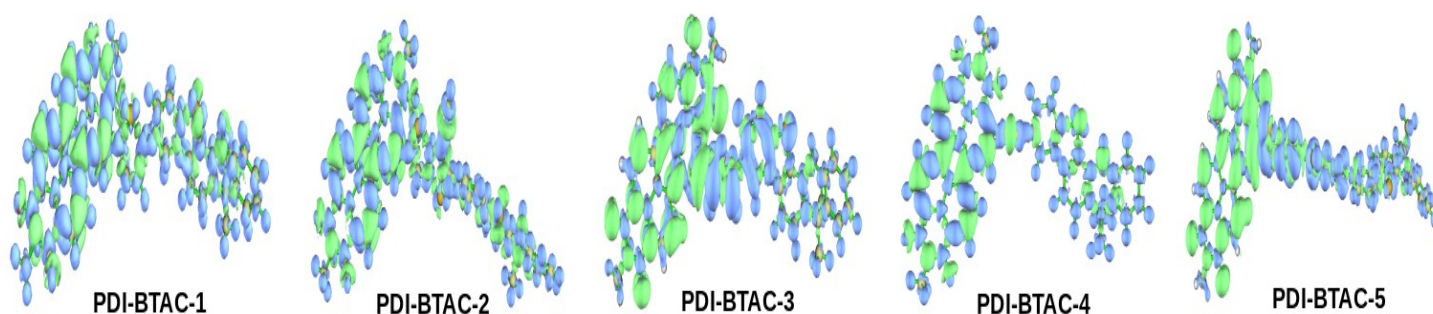

Fig. S6 : Electron density difference (EDD) maps for the studied compounds.

Table S4 : Absorption properties of the studied dimers in the chloroform solvent ( $\epsilon=4.7113$ ) at the CAM-B3LYP/6-31G(d) level of theory.

| Compounds   | $\lambda_{\max}$<br>(nm) | $E_g$ (eV) | $f_{\text{osc}}$ | Configuration       | Orbital<br>Contribution<br>(%) | $n_\lambda$ |
|-------------|--------------------------|------------|------------------|---------------------|--------------------------------|-------------|
| PDI-DTT-1   | 481.27                   | 2.576      | 1.81             | H-3 $\rightarrow$ L | 46                             | 0.9845      |
| PDI-DTT-2   | 490.75                   | 2.526      | 1.39             | H $\rightarrow$ L   | 66                             | 0.9593      |
| PDI-DTT-3   | 516.93                   | 2.398      | 0.76             | H $\rightarrow$ L   | 62                             | 0.8262      |
| PDI-DTT-4   | 490.69                   | 2.527      | 2.20             | H $\rightarrow$ L   | 53                             | 0.9937      |
| PDI-DTT-5   | 502.74                   | 2.466      | 1.82             | H $\rightarrow$ L   | 56                             | 0.9848      |
| PDI-EDOT-1  | 521.06                   | 2.337      | 1.23             | H-1 $\rightarrow$ L | 31                             | 0.9411      |
| PDI-EDOT-2  | 546.33                   | 2.256      | 0.98             | H $\rightarrow$ L   | 58                             | 0.8953      |
| PDI-EDOT-3  | 531.74                   | 2.217      | 1.36             | H $\rightarrow$ L   | 55                             | 0.9563      |
| PDI-EDOT-4  | 482.96                   | 2.567      | 1.54             | H-1 $\rightarrow$ L | 30                             | 0.9711      |
| PDI-EDOT-5  | 535.10                   | 2.317      | 1.15             | H $\rightarrow$ L   | 51                             | 0.9292      |
| PDI-BDT-1   | 480.72                   | 2.579      | 0.62             | H-3 $\rightarrow$ L | 72                             | 0.7601      |
| PDI-BDT-2   | 481.08                   | 2.577      | 0.66             | H-3 $\rightarrow$ L | 75                             | 0.7812      |
| PDI-BDT-3   | 489.45                   | 2.533      | 0.70             | H $\rightarrow$ L   | 39                             | 0.8005      |
| PDI-BDT-4   | 478.57                   | 2.591      | 1.33             | H-3 $\rightarrow$ L | 78                             | 0.9532      |
| PDI-BDT-5   | 485.12                   | 2.556      | 1.86             | H $\rightarrow$ L   | 48                             | 0.9862      |
| PDI-BITHN-1 | 608.16                   | 2.039      | 0.97             | H $\rightarrow$ L   | 64                             | 0.8928      |
| PDI-BITHN-2 | 606.98                   | 2.043      | 0.74             | H $\rightarrow$ L   | 70                             | 0.8180      |



|             |        |       |      |         |    |        |
|-------------|--------|-------|------|---------|----|--------|
| PDI-BITHN-3 | 647.73 | 1.914 | 1.33 | H → L   | 70 | 0.9532 |
| PDI-BITHN-4 | 650.20 | 1.907 | 2.22 | H → L   | 67 | 0.9940 |
| PDI-BITHN-5 | 623.09 | 1.990 | 1.03 | H → L   | 68 | 0.9067 |
| PDI-BTAC-1  | 478.63 | 2.590 | 0.18 | H-3 → L | 31 | 0.3393 |
| PDI-BTAC-2  | 487.21 | 2.481 | 0.54 | H-3 → L | 56 | 0.7116 |
| PDI-BTAC-3  | 479.56 | 2.585 | 0.72 | H-4 → L | 41 | 0.8094 |
| PDI-BTAC-4  | 475.84 | 2.606 | 0.90 | H-3 → L | 32 | 0.8741 |
| PDI-BTAC-5  | 498.42 | 2.420 | 0.82 | H-3 → L | 34 | 0.8486 |

Table S5 : Absorption properties of the studied monomers in the gas phase.

| <b>Compounds</b> | $\lambda_{\max}$ (nm) | $E_g$ (eV) | $f_{\text{osc}}$ | <b>Configuration</b> | <b>Orbital Contribution (%)</b> |
|------------------|-----------------------|------------|------------------|----------------------|---------------------------------|
| PDI-DTT-1        | 458                   | 2.703      | 0.16             | H → L                | 73                              |
| PDI-DTT-2        | 477                   | 2.598      | 0.28             | H → L                | 82                              |
| PDI-DTT-3        | 491                   | 2.521      | 0.26             | H → L                | 85                              |
| PDI-DTT-4        | 454                   | 2.729      | 0.44             | H → L                | 59                              |
| PDI-DTT-5        | 485                   | 2.554      | 0.46             | H → L                | 71                              |
| PDI-EDOT-1       | 483                   | 2.563      | 0.16             | H → L                | 88                              |
| PDI-EDOT-2       | 501                   | 2.474      | 0.32             | H → L                | 84                              |
| PDI-EDOT-3       | 495                   | 2.501      | 0.17             | H → L                | 90                              |
| PDI-EDOT-4       | 452                   | 2.741      | 0.63             | H → L                | 63                              |
| PDI-EDOT-5       | 504                   | 2.460      | 0.35             | H → L                | 79                              |
| PDI-BDT-1        | 455                   | 2.725      | 0.44             | H-1 → L              | 65                              |
| PDI-BDT-2        | 461                   | 2.685      | 0.25             | H → L                | 76                              |
| PDI-BDT-3        | 480                   | 2.579      | 0.22             | H → L                | 79                              |
| PDI-BDT-4        | 452                   | 2.740      | 0.73             | H-1 → L              | 84                              |
| PDI-BDT-5        | 481                   | 2.576      | 0.49             | H → L                | 70                              |
| PDI-BITHN-1      | 536                   | 2.312      | 0.33             | H → L                | 82                              |
| PDI-BITHN-2      | 509                   | 2.433      | 0.40             | H → L                | 76                              |

|             |     |       |      |          |    |
|-------------|-----|-------|------|----------|----|
| PDI-BITHN-3 | 591 | 2.095 | 0.48 | H → L    | 83 |
| PDI-BITHN-4 | 569 | 2.178 | 0.87 | H → L    | 79 |
| PDI-BITHN-5 | 504 | 2.459 | 0.79 | H → L    | 54 |
| PDI-BTAC-1  | 453 | 2.732 | 0.78 | H -2 → L | 75 |
| PDI-BTAC-2  | 454 | 2.730 | 0.77 | H -2 → L | 90 |
| PDI-BTAC-3  | 467 | 2.653 | 0.19 | H-1 → L  | 54 |
| PDI-BTAC-4  | 451 | 2.744 | 0.72 | H-1 → L  | 82 |
| PDI-BTAC-5  | 478 | 2.590 | 0.33 | H → L    | 62 |

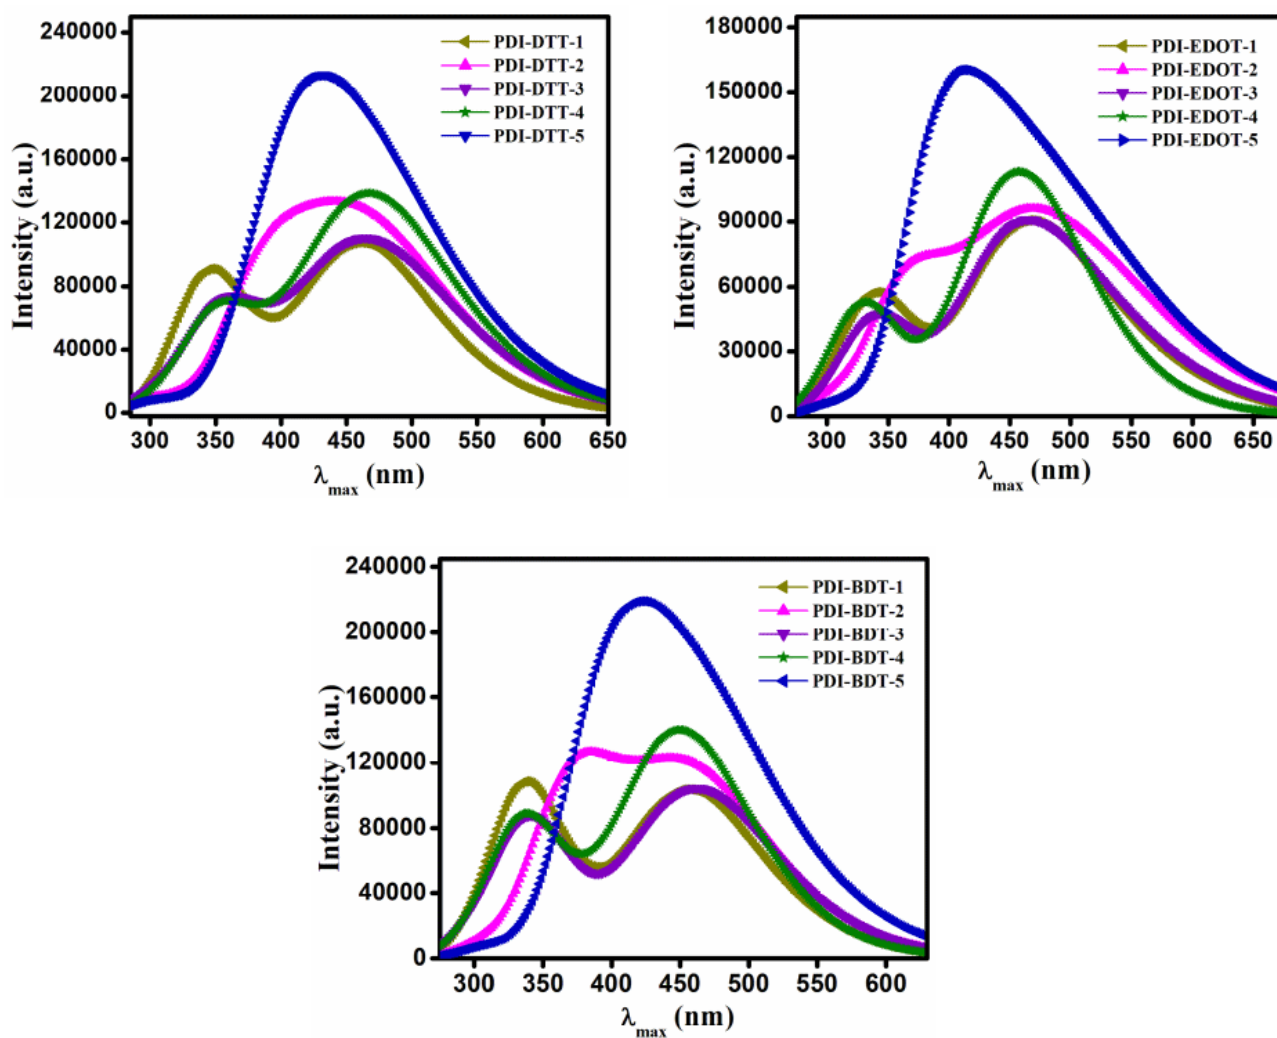

Fig. S7 : Absorption spectra of the PDI-DTT, PDI-EDOT and PDI-BDT groups of dimers.

Table S6 : Energies of planarized and neutral geometries obtained for distortion energy calculation.

| <b>Compounds</b> | <b>E<sub>planarized</sub> (eV)</b> | <b>E<sub>neutral</sub> (eV)</b> | <b>ΔE<sub>dis</sub> (eV)</b> |
|------------------|------------------------------------|---------------------------------|------------------------------|
| PDI-DTT-1        | -94210.760                         | -94212.104                      | 1.344                        |
| PDI-DTT-2        | -109191.902                        | -109193.417                     | 1.515                        |
| PDI-DTT-3        | -85423.169                         | -85423.586                      | 0.417                        |
| PDI-DTT-4        | -81268.726                         | -81268.798                      | 0.072                        |
| PDI-DTT-5        | -135045.168                        | -135046.359                     | 1.191                        |
| PDI-EDOT-1       | -74592.161                         | -74593.822                      | 1.661                        |
| PDI-EDOT-2       | -89573.245                         | -89575.094                      | 1.849                        |
| PDI-EDOT-3       | -65804.673                         | -65805.217                      | 0.544                        |
| PDI-EDOT-4       | -61650.326                         | -61650.447                      | 0.121                        |
| PDI-EDOT-5       | -115426.944                        | -115428.025                     | 1.081                        |
| PDI-BDT-1        | -85482.792                         | -85484.301                      | 1.509                        |
| PDI-BDT-2        | -100463.371                        | -100465.537                     | 2.166                        |
| PDI-BDT-3        | -76695.265                         | -76695.736                      | 0.471                        |
| PDI-BDT-4        | -72540.8823                        | -72540.8828                     | 0.0005                       |
| PDI-BDT-5        | -126316.889                        | -126318.506                     | 1.617                        |
| PDI-BITHN-1      | -91766.066                         | -91771.182                      | 5.116                        |
| PDI-BITHN-2      | -106746.143                        | -106752.397                     | 6.254                        |
| PDI-BITHN-3      | -82978.496                         | -82982.720                      | 4.224                        |
| PDI-BITHN-4      | -78824.256                         | -78827.995                      | 3.739                        |
| PDI-BITHN-5      | -132596.950                        | -132605.350                     | 8.400                        |
| PDI-BTAC-1       | -87725.292                         | -87727.183                      | 1.891                        |
| PDI-BTAC-2       | -102706.728                        | -102708.443                     | 1.715                        |
| PDI-BTAC-3       | -78938.130                         | -78938.682                      | 0.552                        |
| PDI-BTAC-4       | -74783.799                         | -74783.817                      | 0.018                        |
| PDI-BTAC-5       | -128559.976                        | -128561.399                     | 1.423                        |

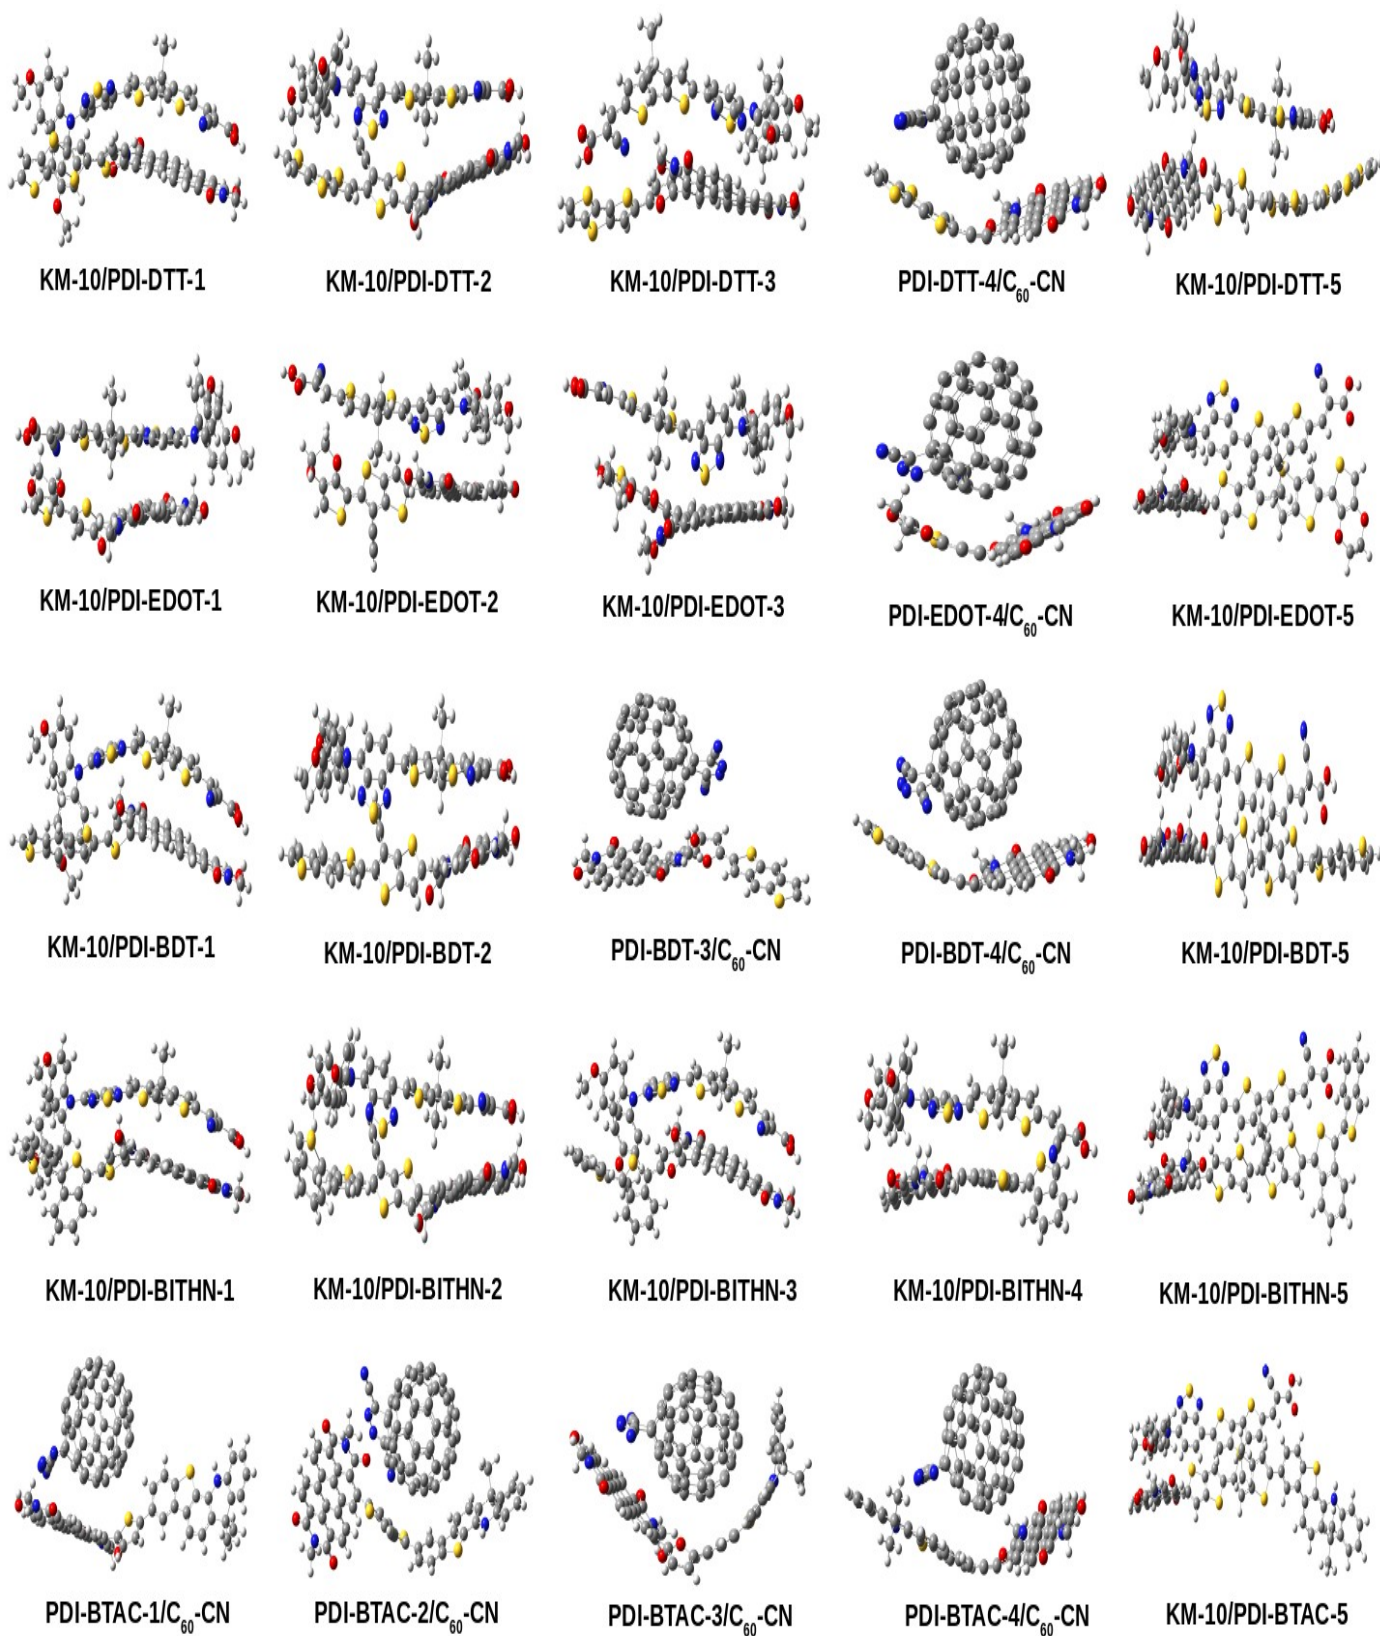

Fig. S8 : Optimized structures of the designed D/A complexes.
